# Supplementary material for: SNAI1 is a prognostic biomarker and correlated with immune infiltrates in gastrointestinal cancers
Source: publisher site journal article supplement (doi:10.18632/aging.103667), 2020-08-21
Supplement: Supplementary file [file aging-v12i17-103667-supplementary-material-SD1.pdf]

SUPPLEMENTARY FIGURES

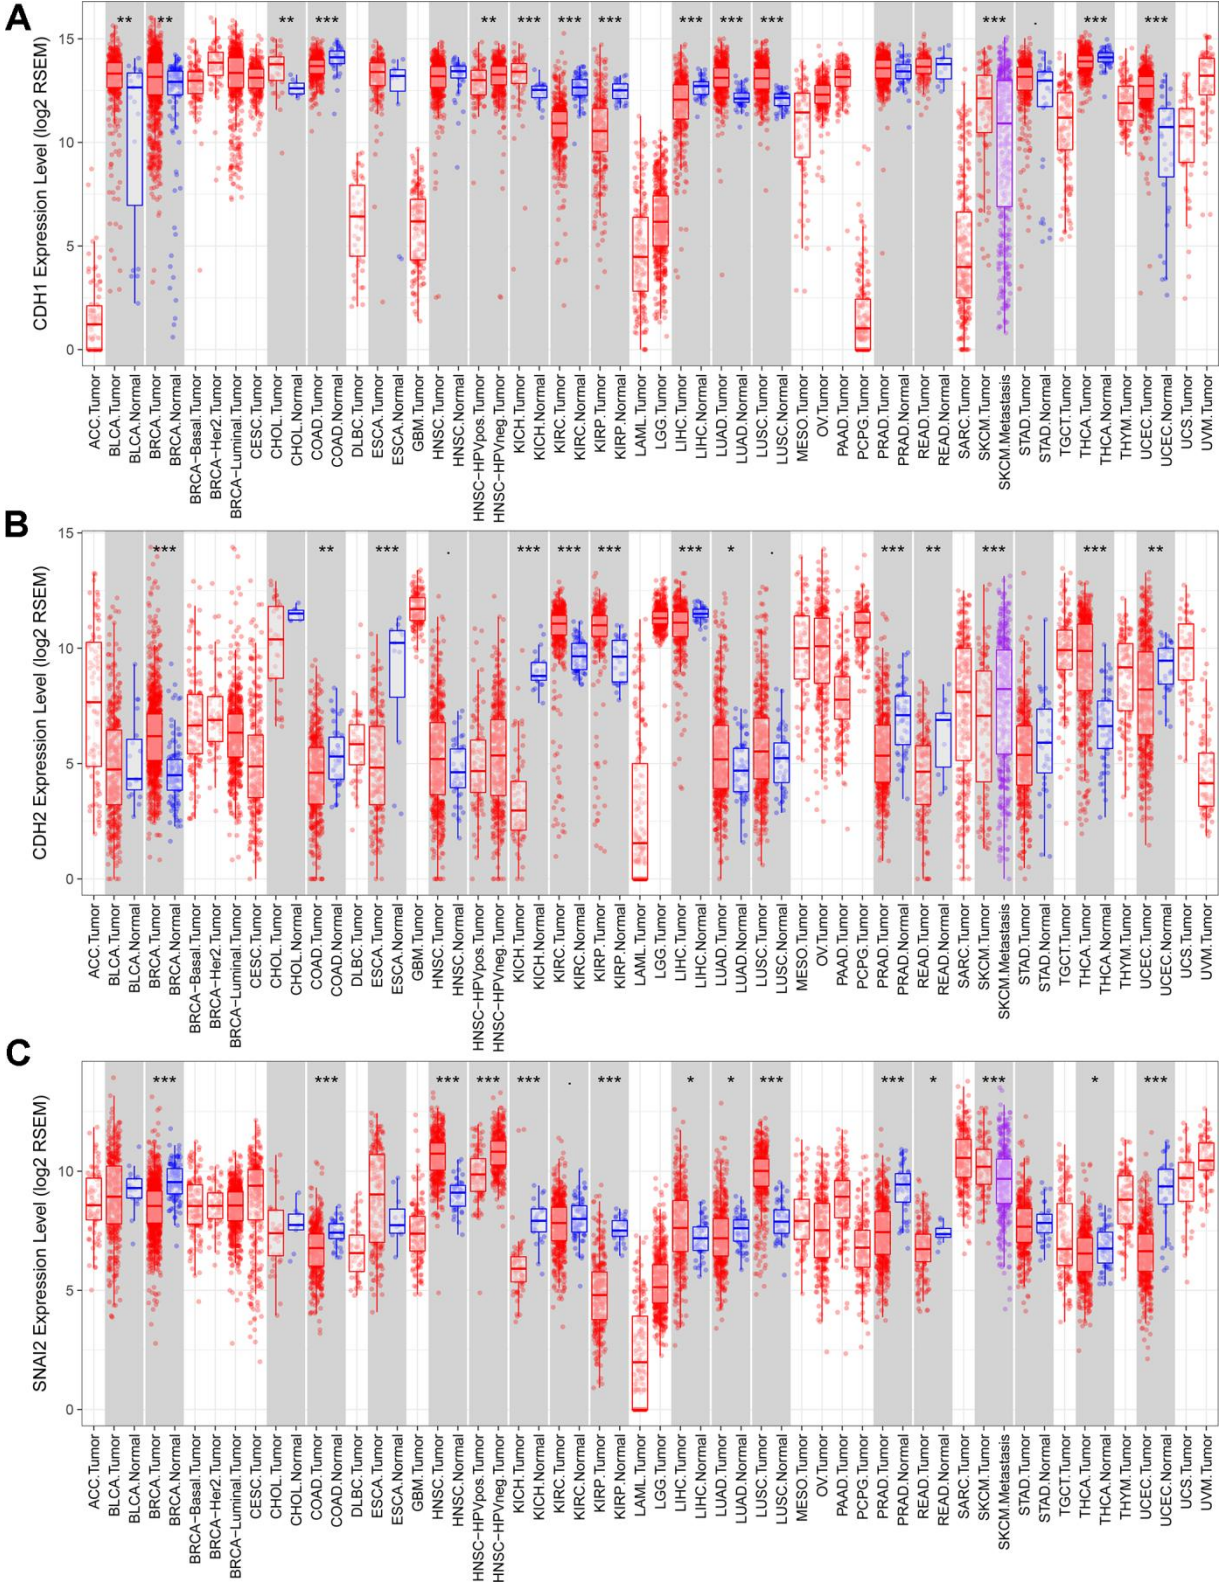

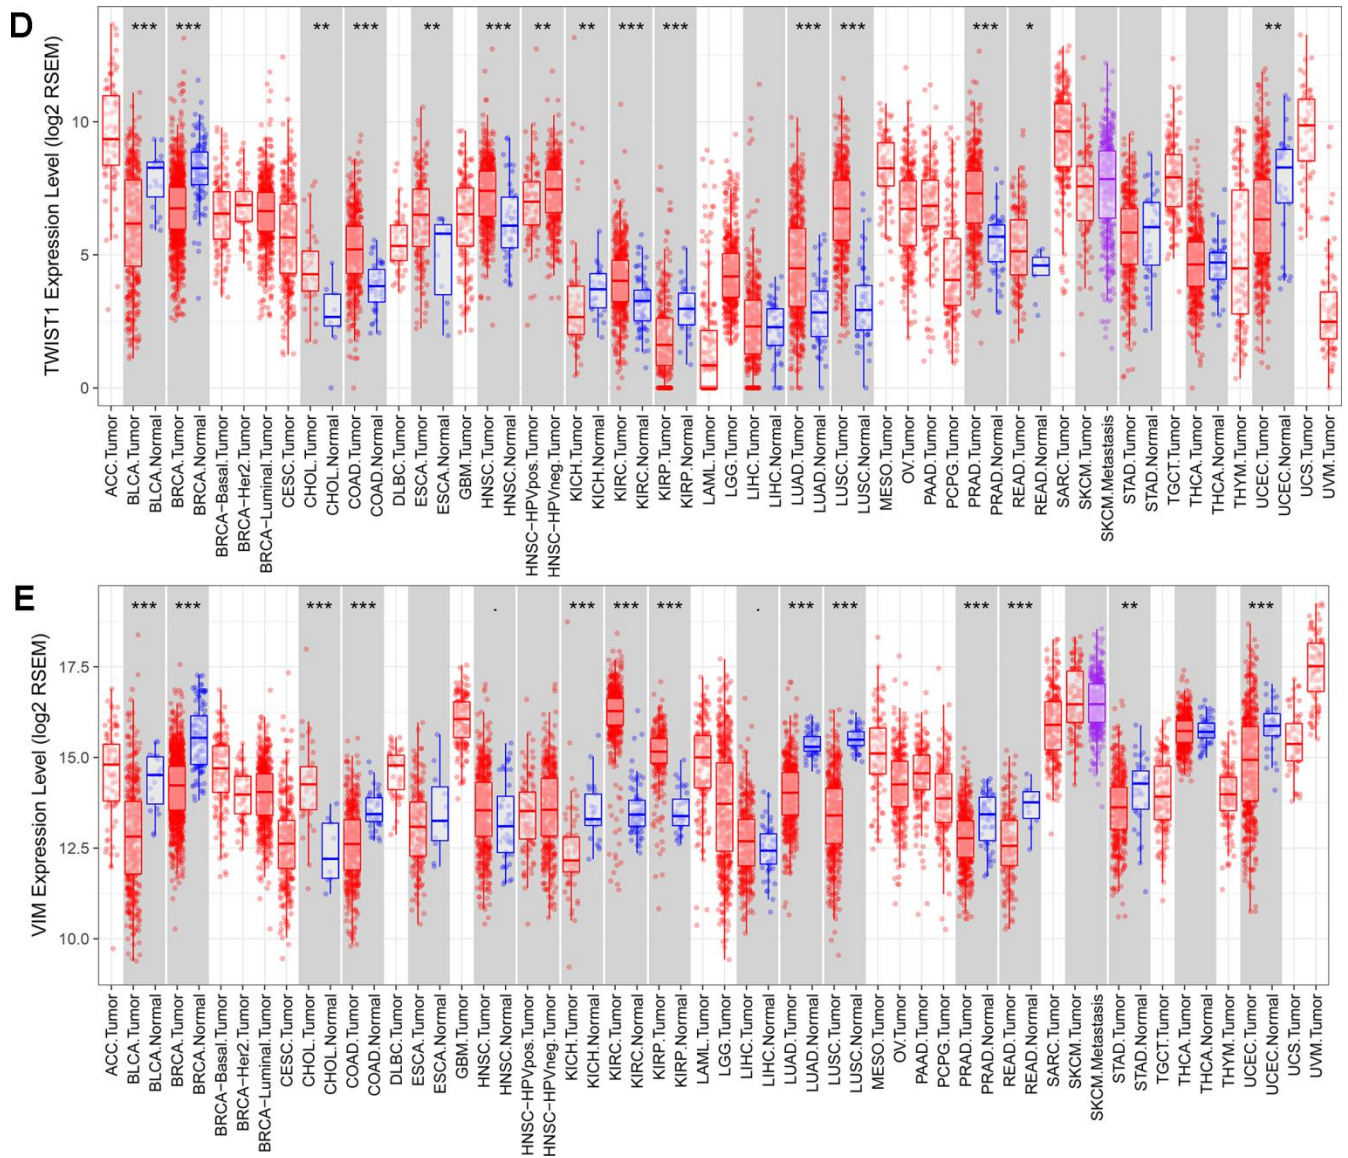

Supplementary Figure 1. The five EMT markers expression levels in different types of human cancers in TCGA dataset.

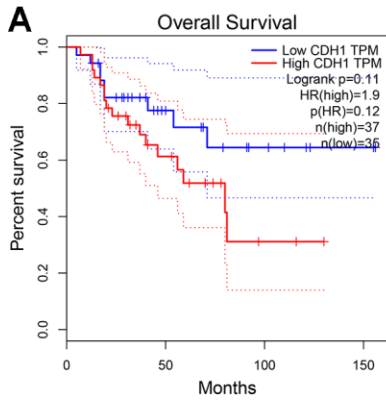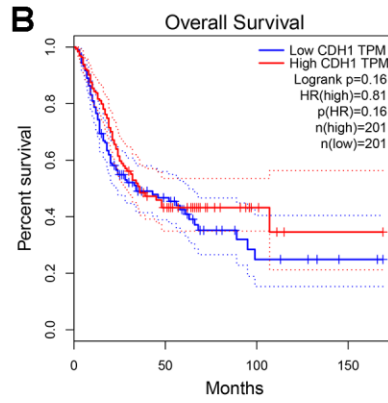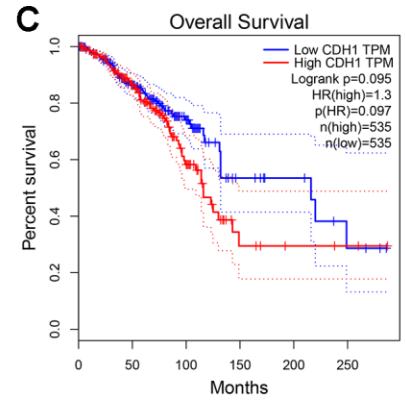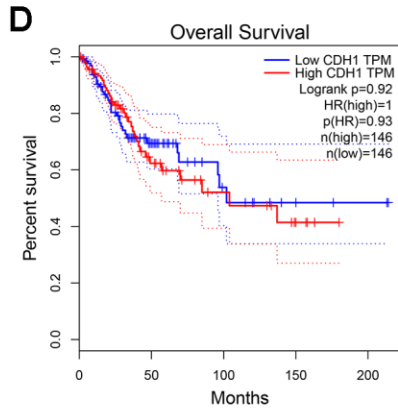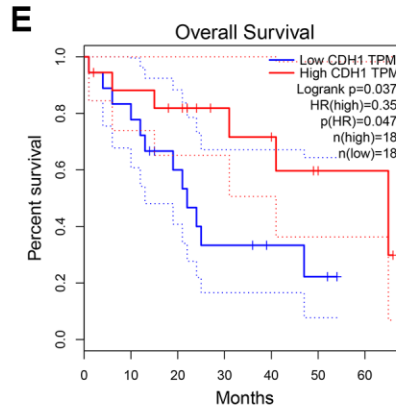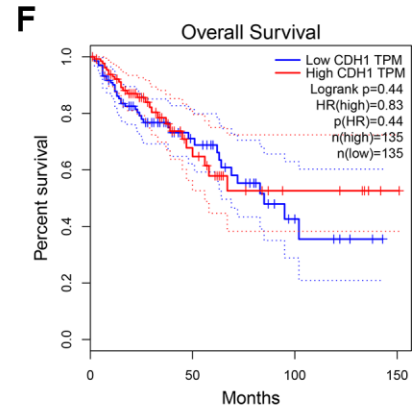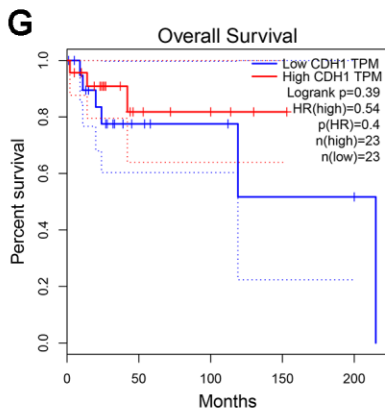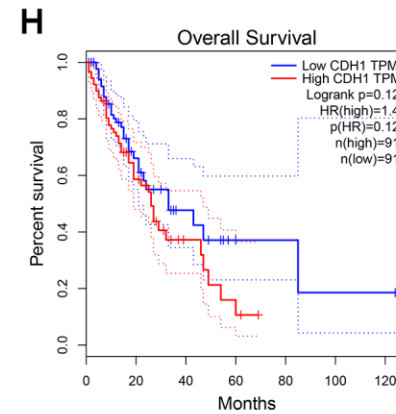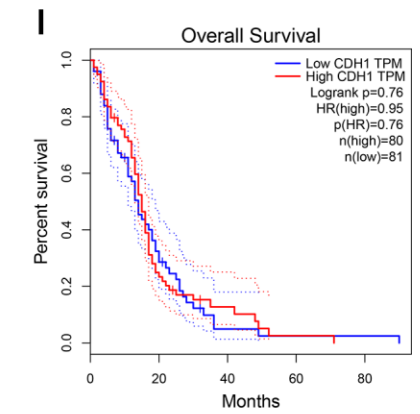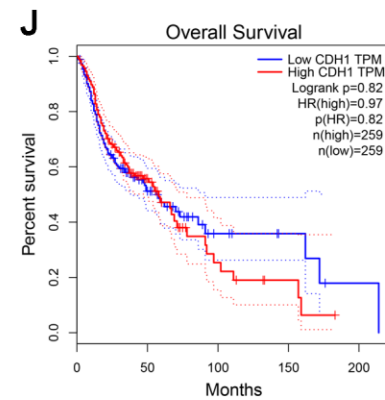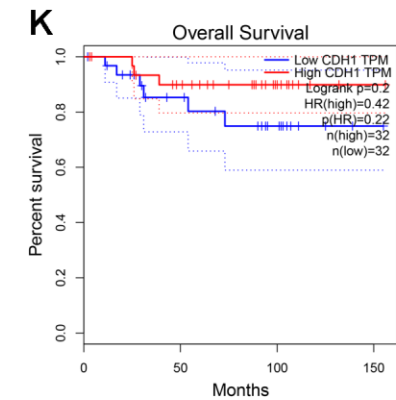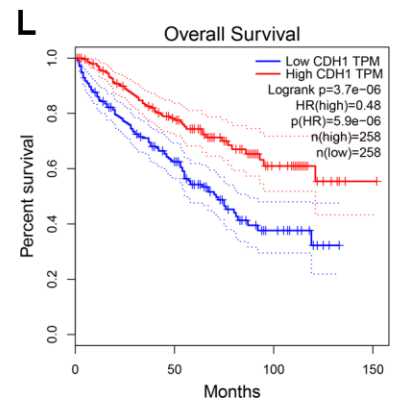

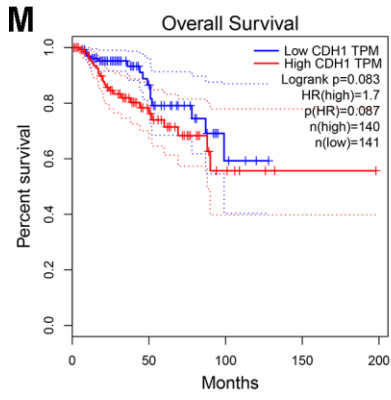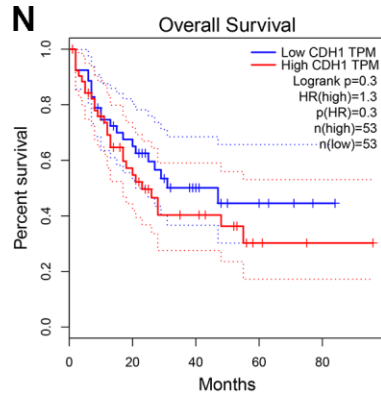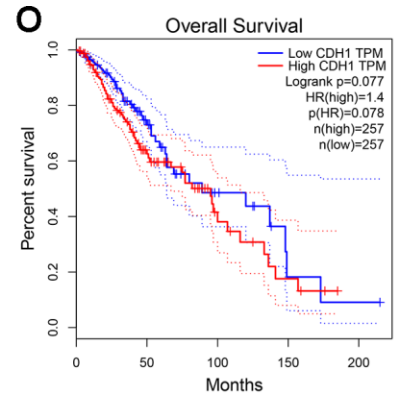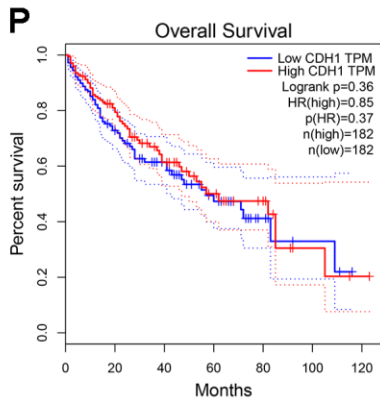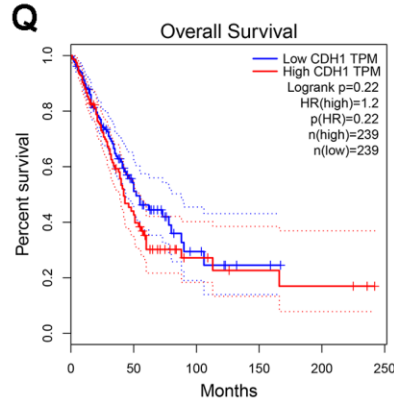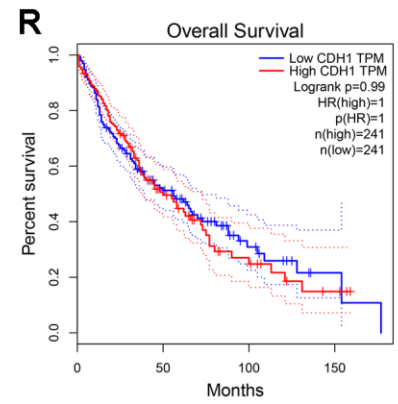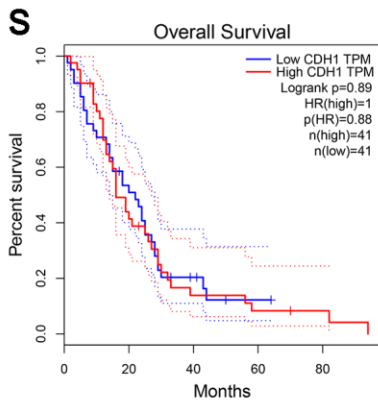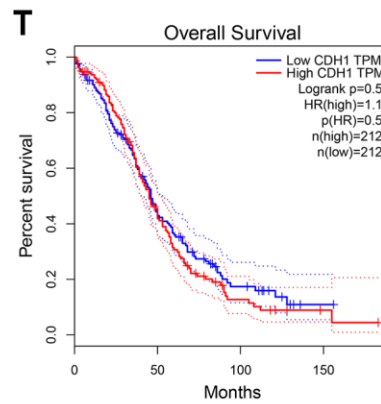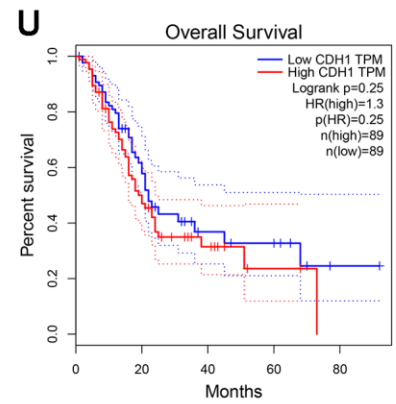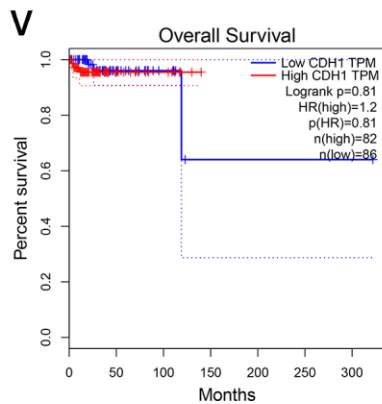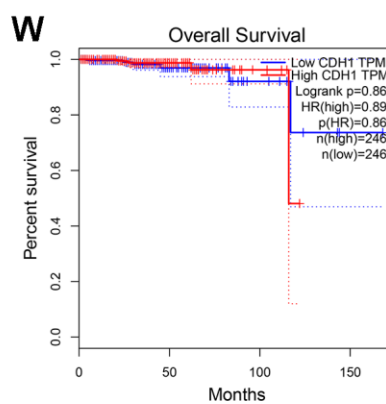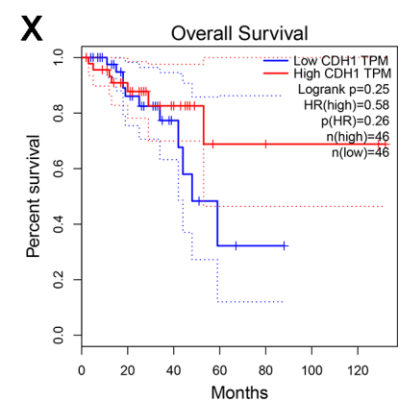

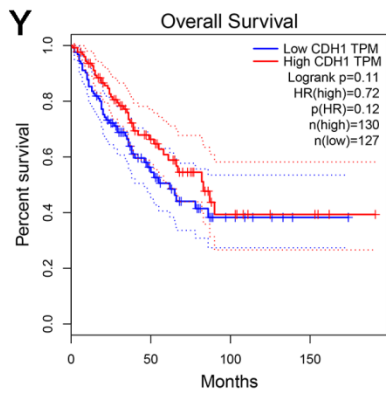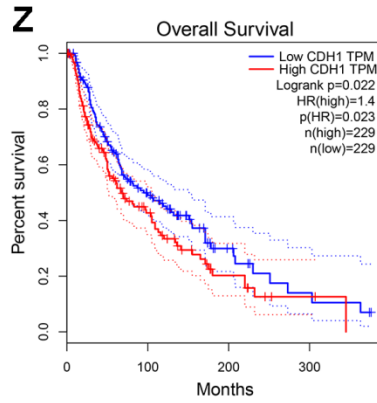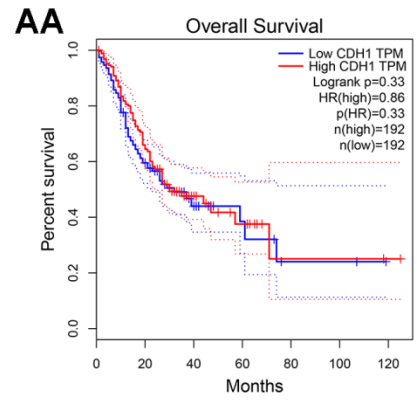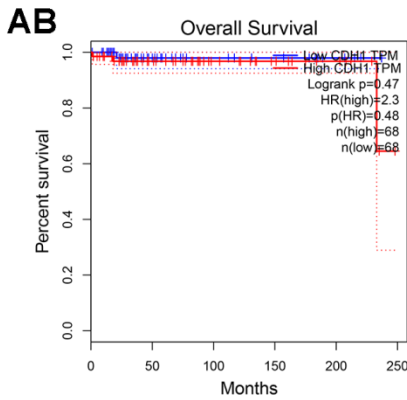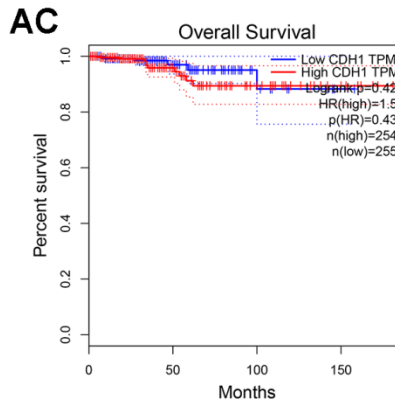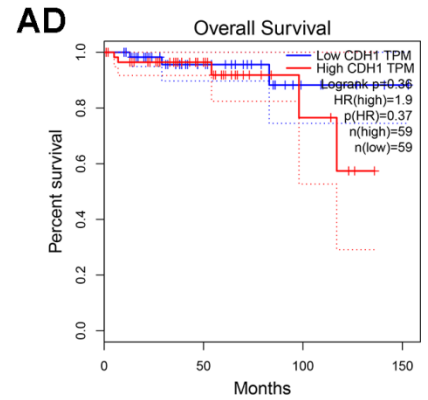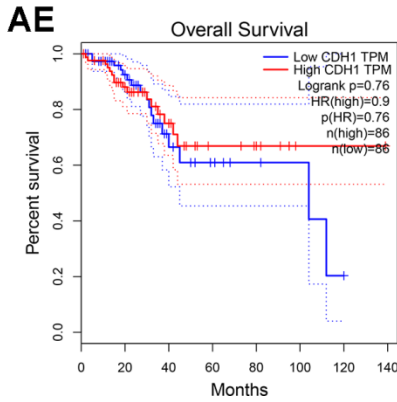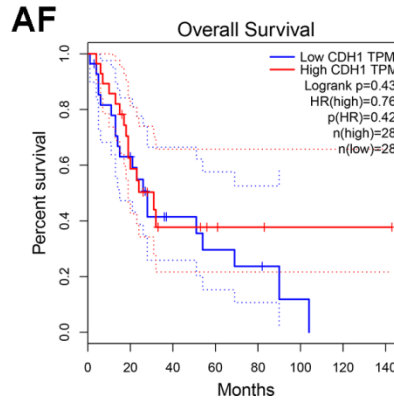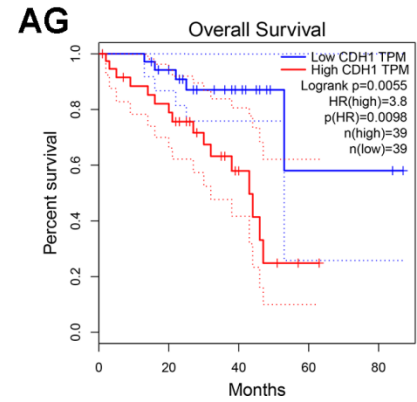

Supplementary Figure 2. Kaplan-Meier survival curves comparing the high and low expression of CDH1 in different types of human cancers in TCGA dataset.

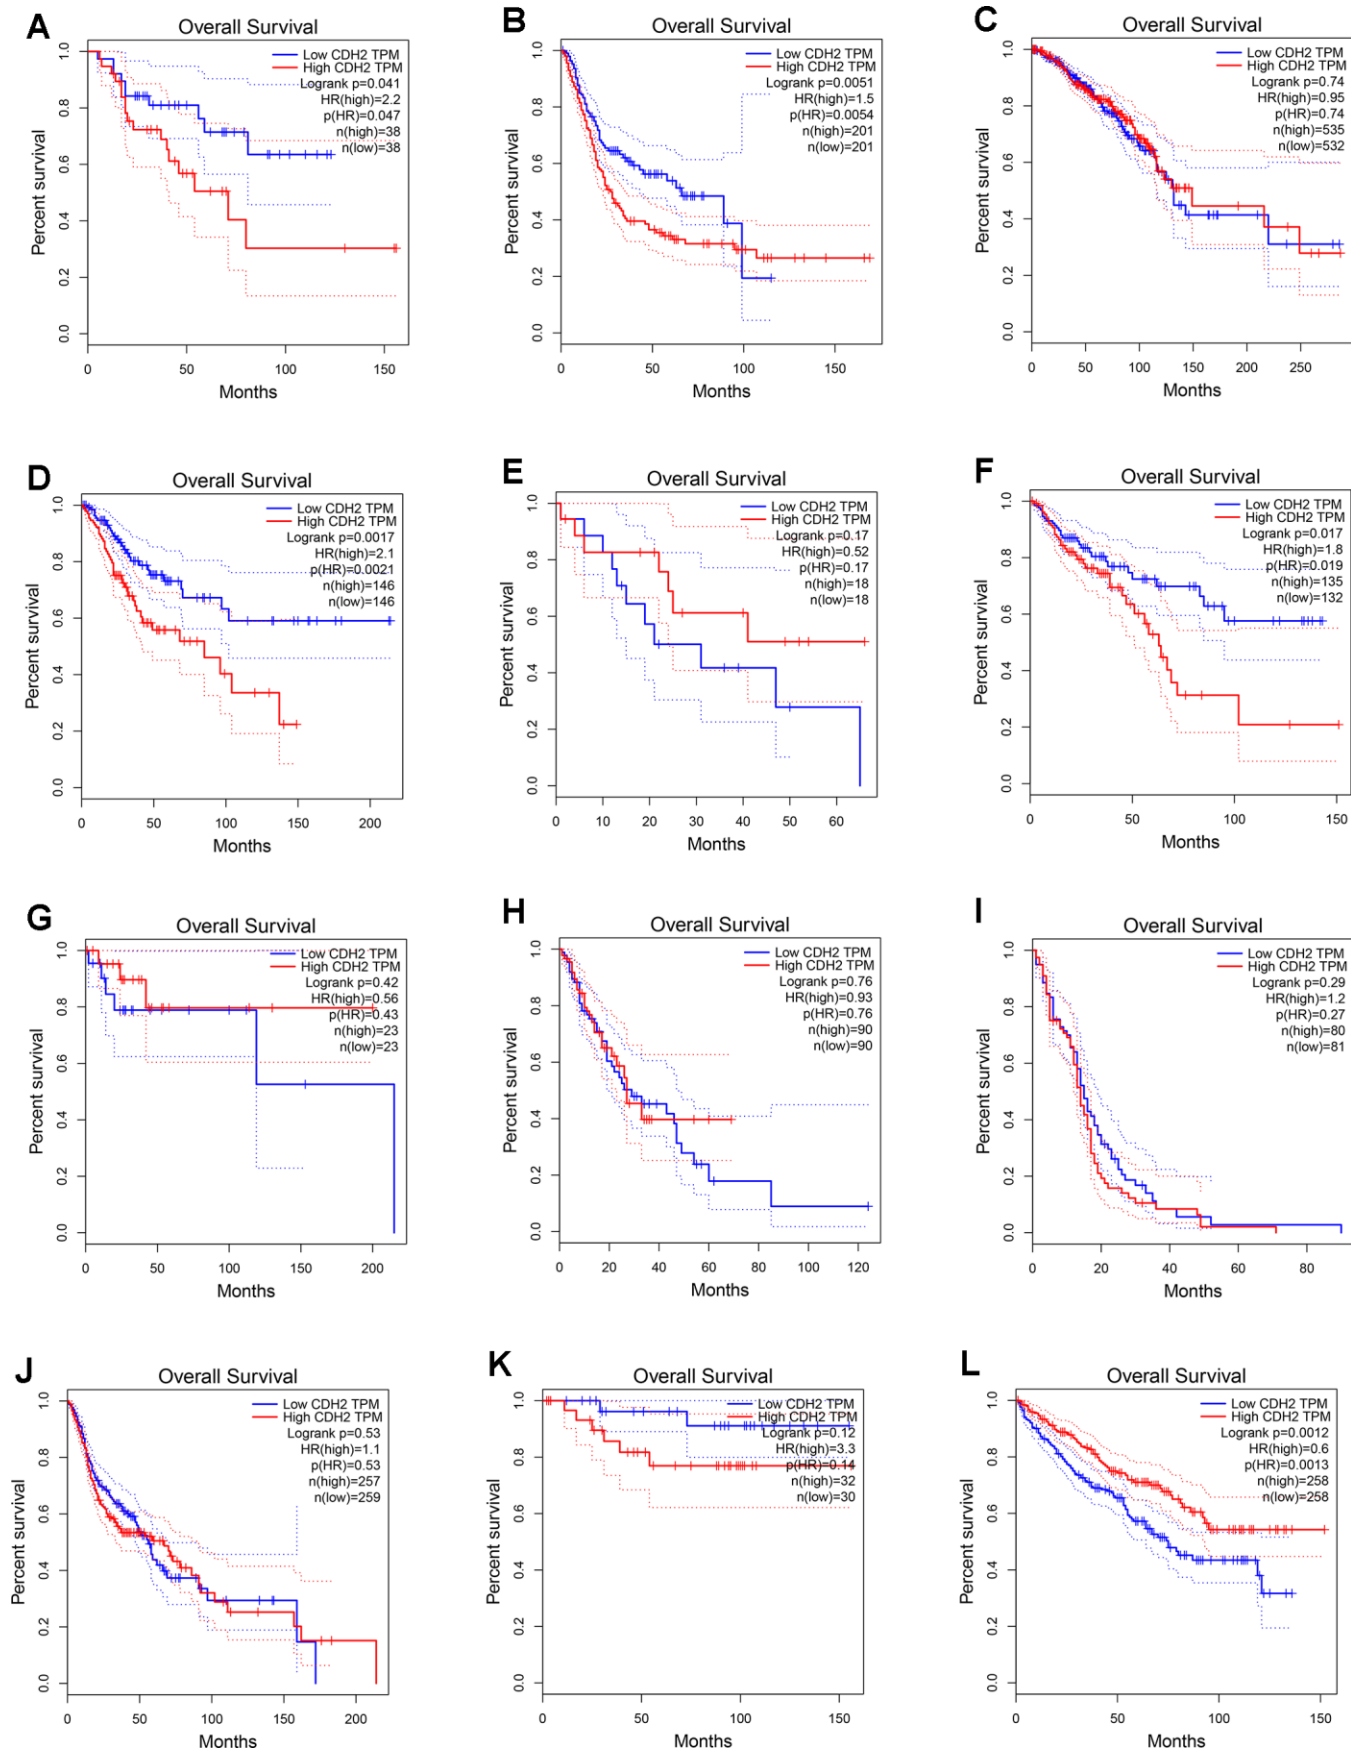

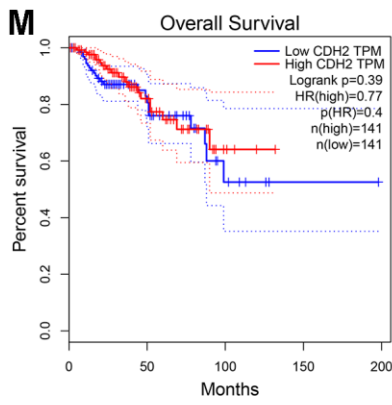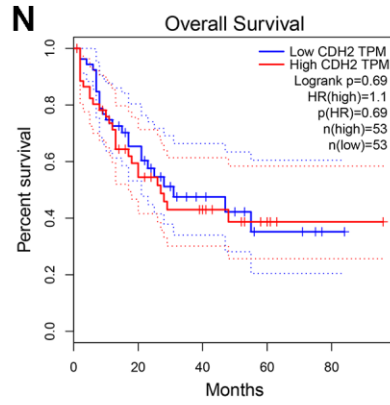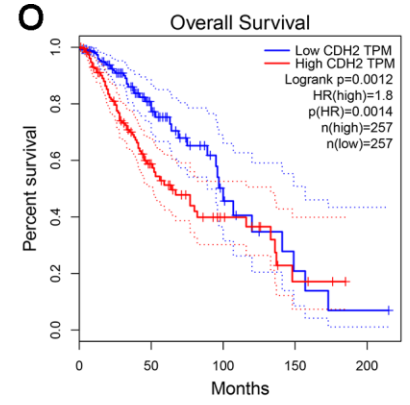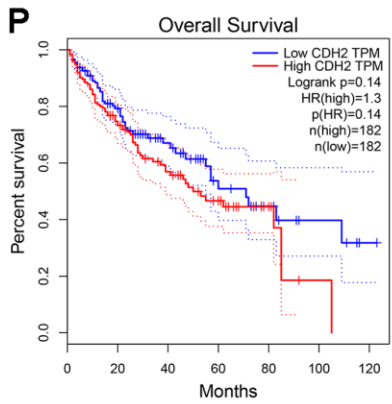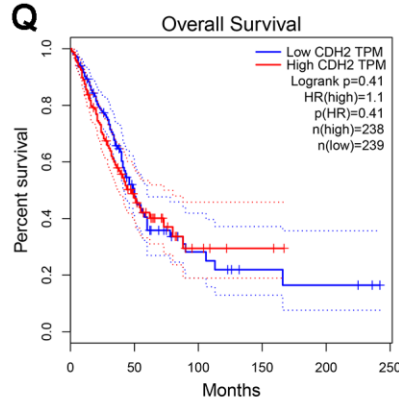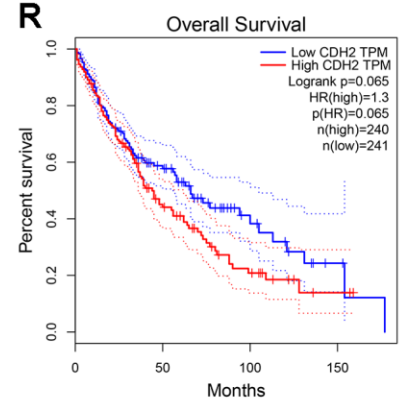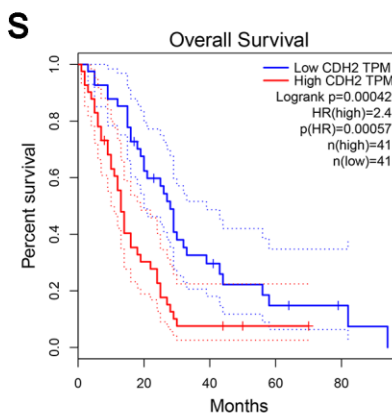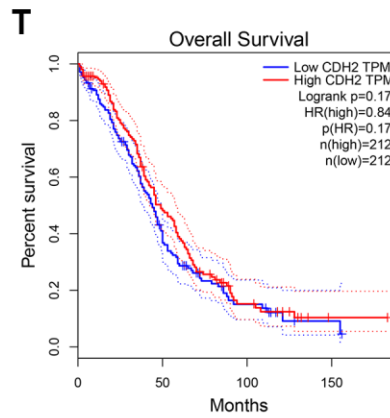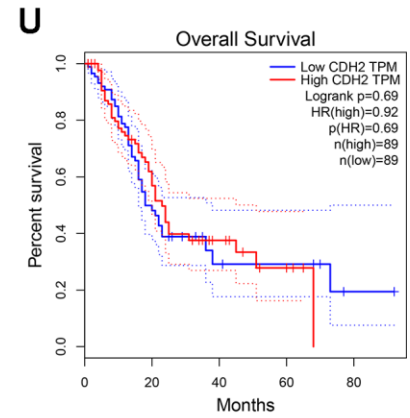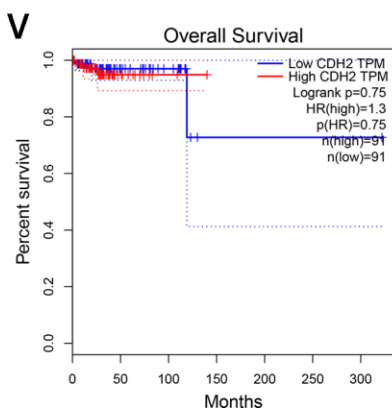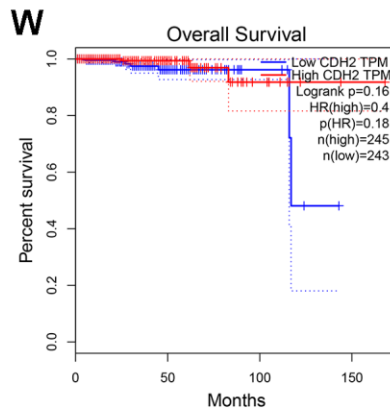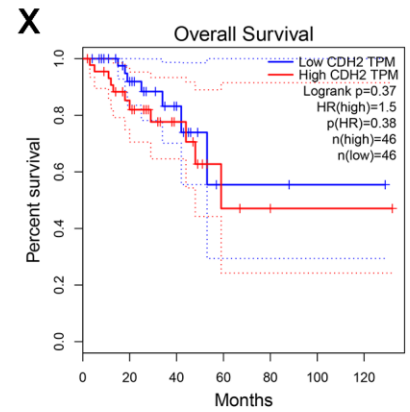

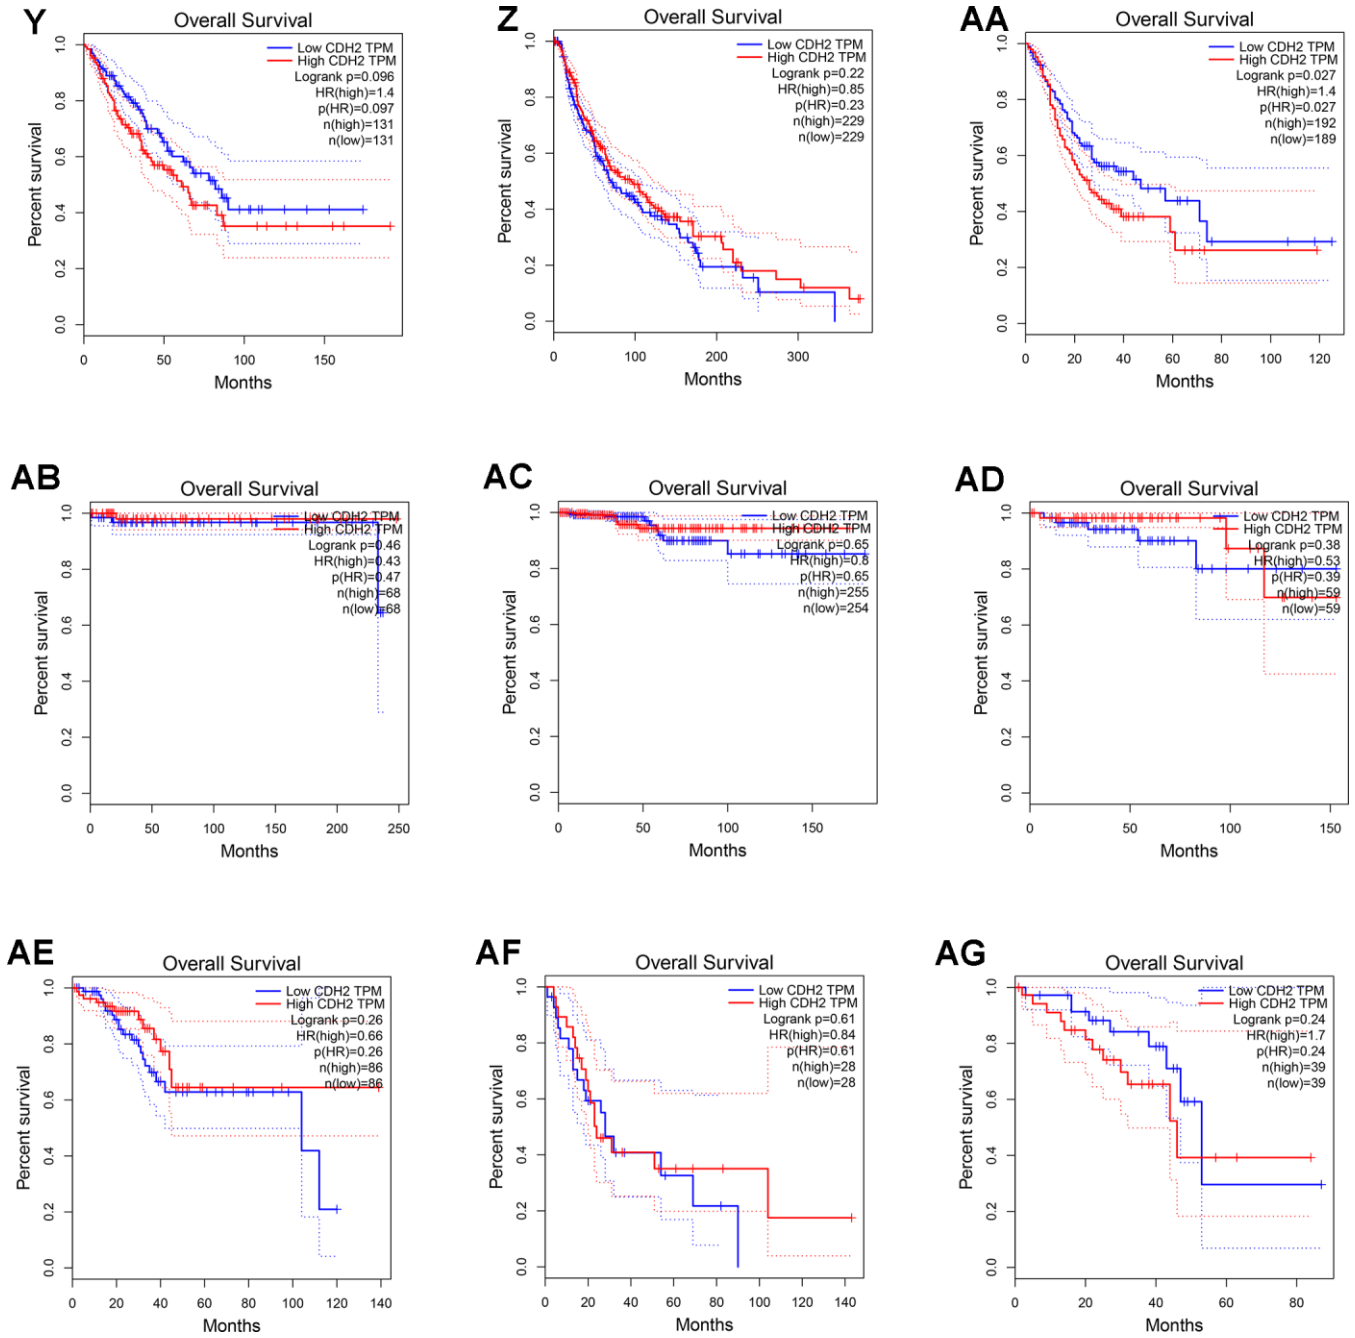

Supplementary Figure 3. Kaplan-Meier survival curves comparing the high and low expression of CDH2 in different types of human cancers in TCGA dataset.



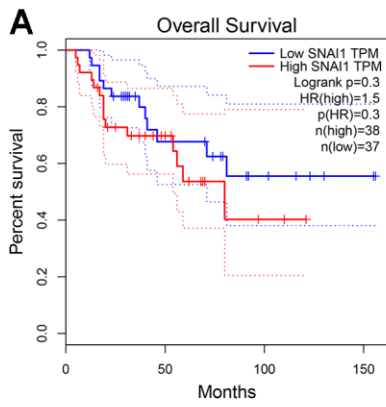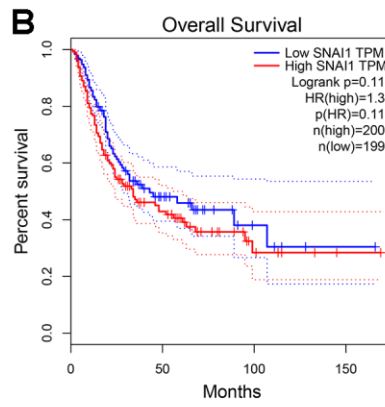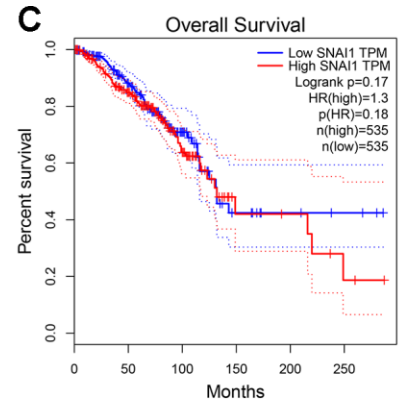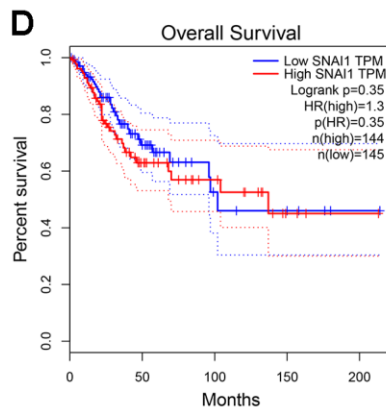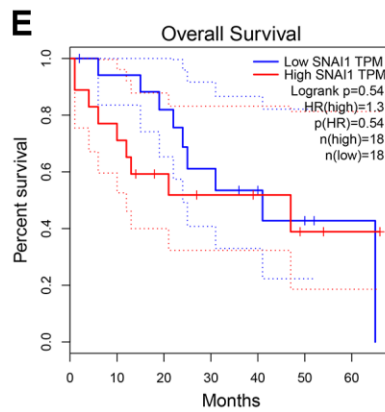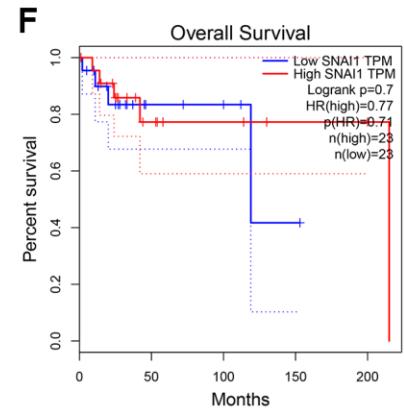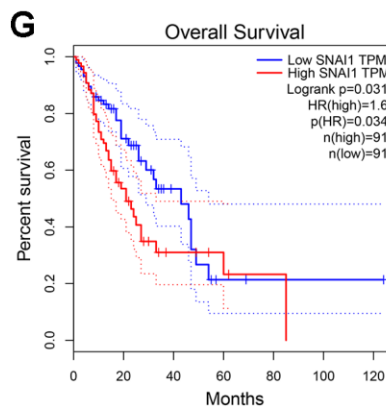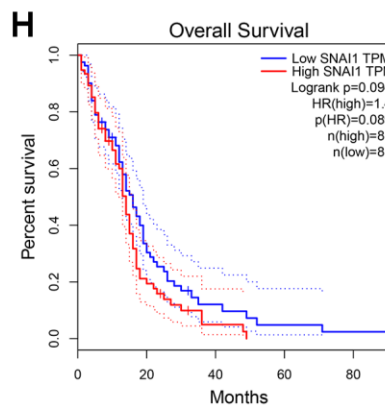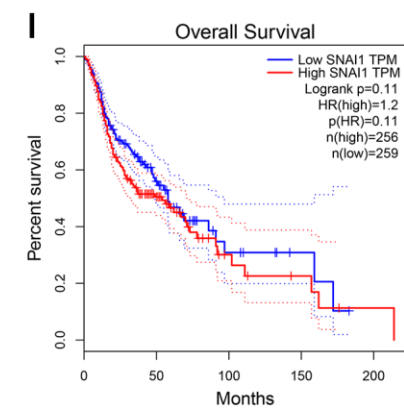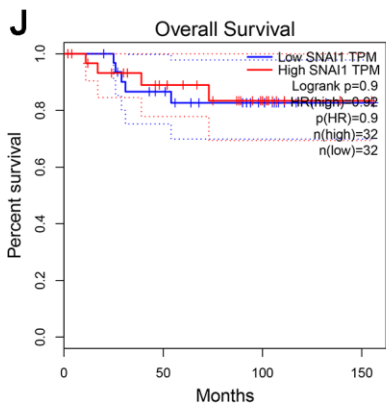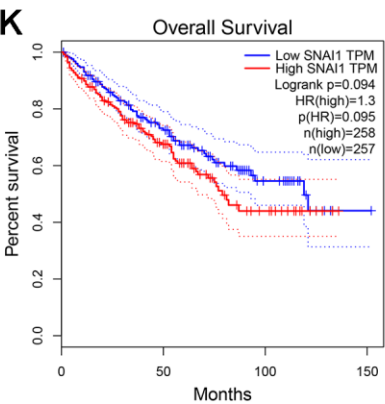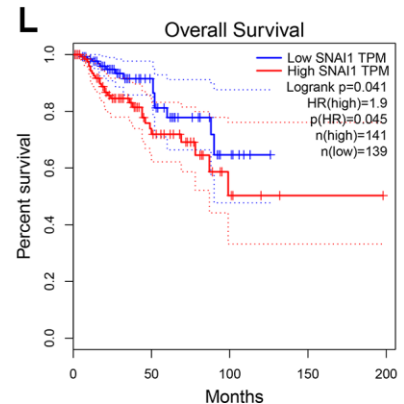

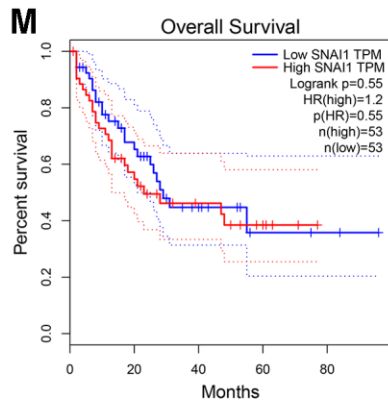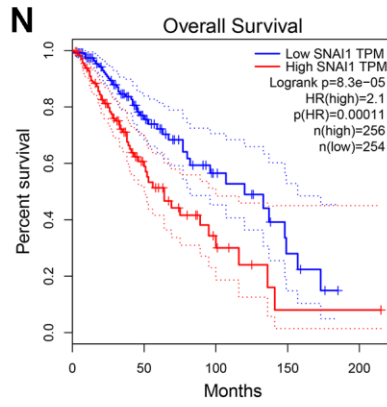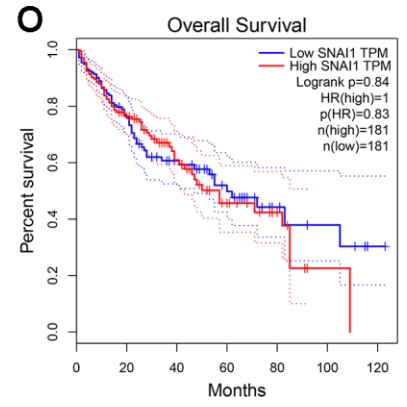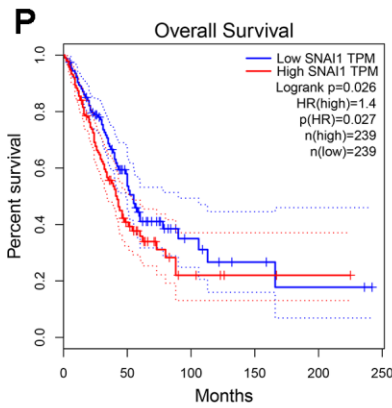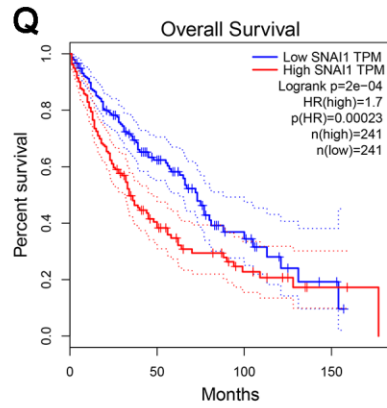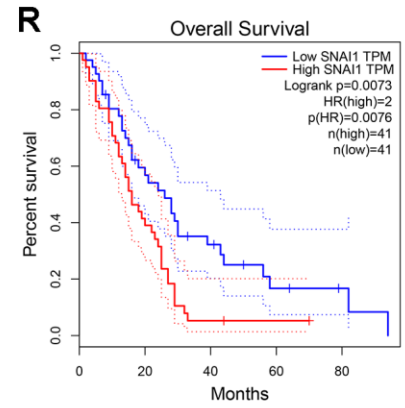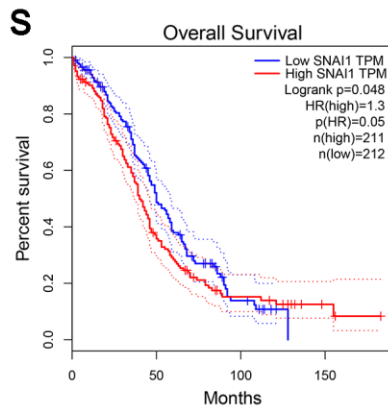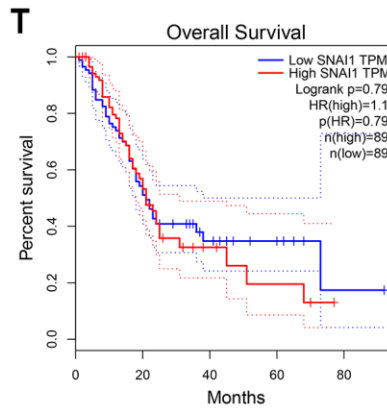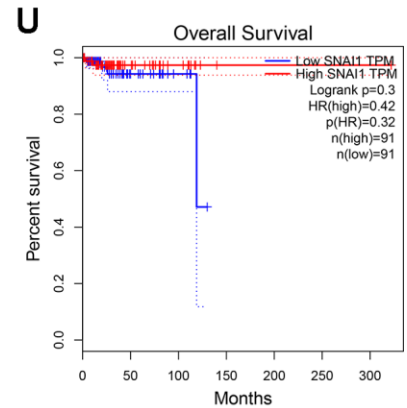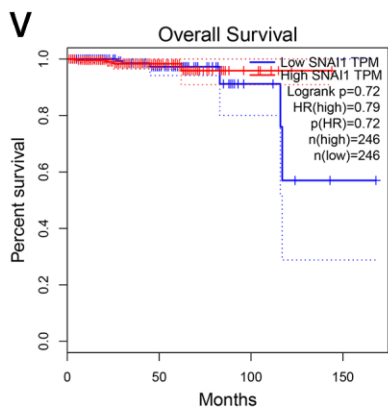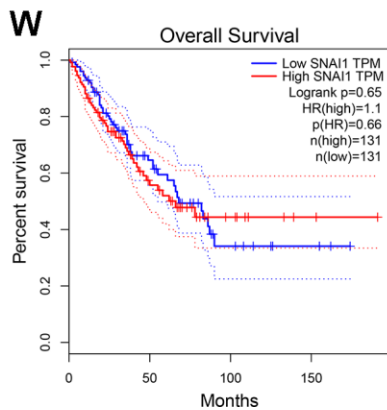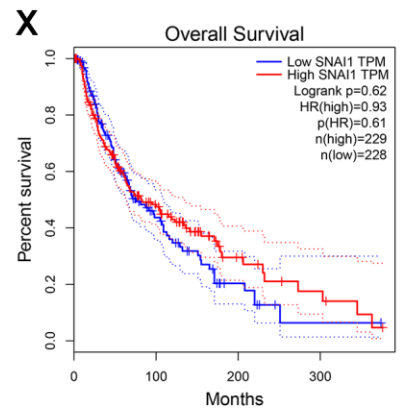

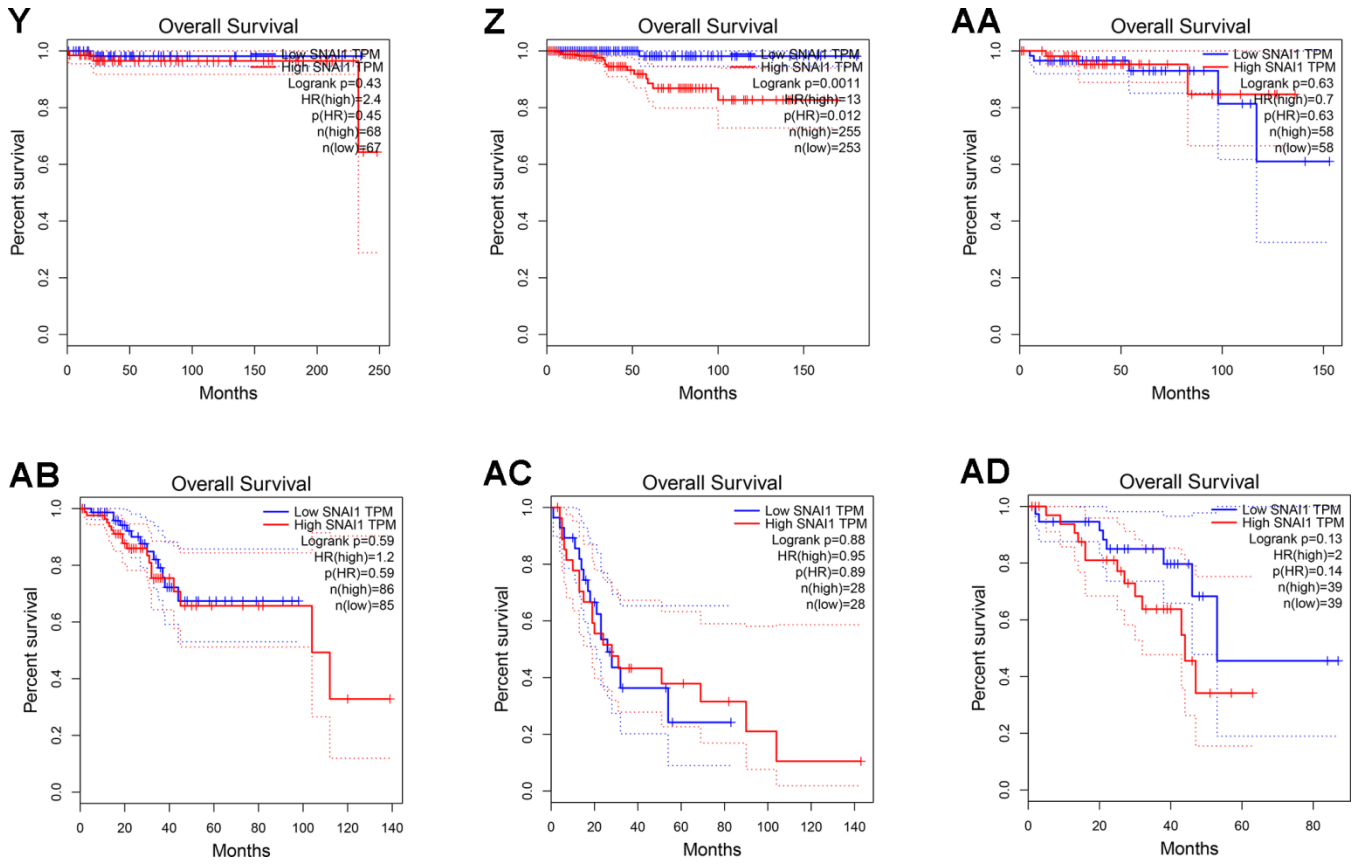

Supplementary Figure 4. Kaplan-Meier survival curves comparing the high and low expression of SNAI1 in different types of human cancers in TCGA dataset.

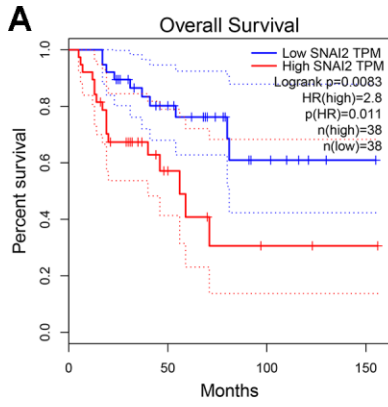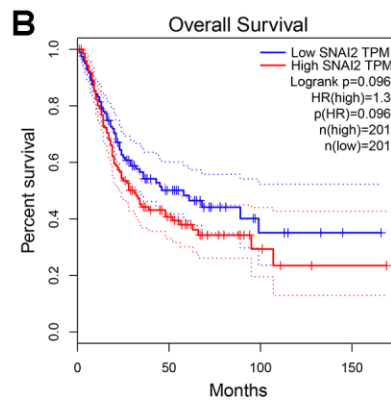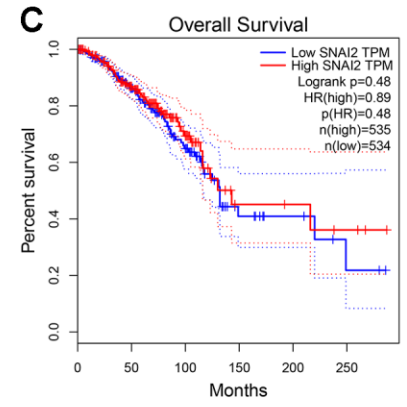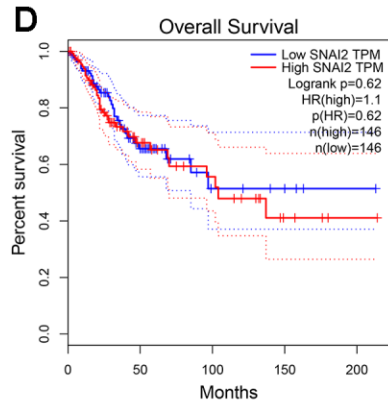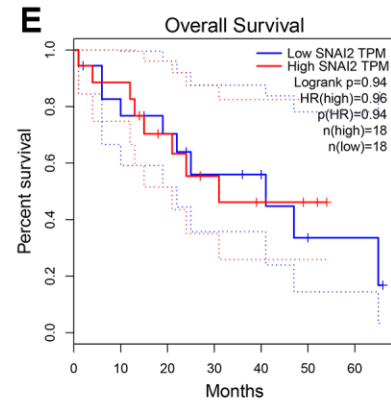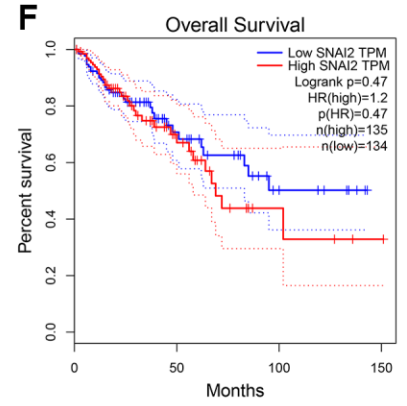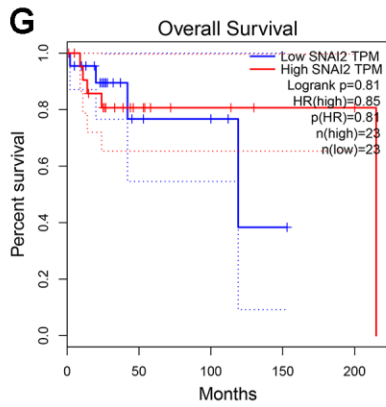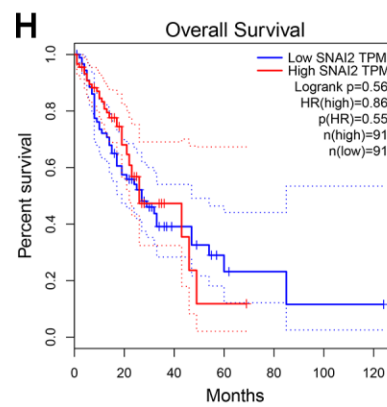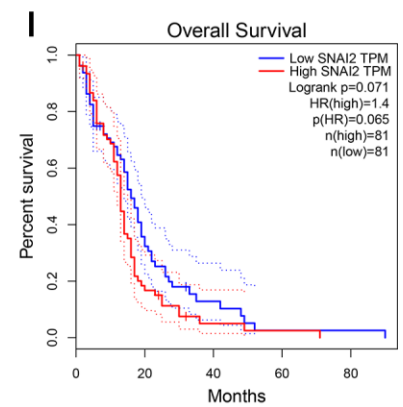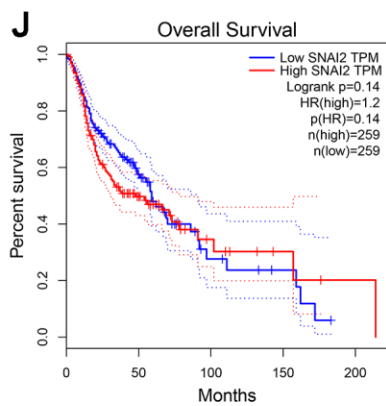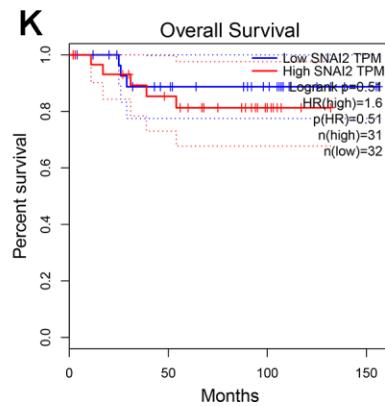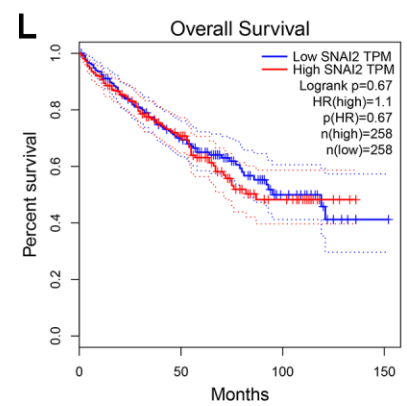

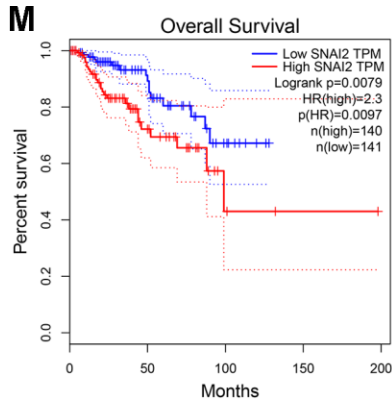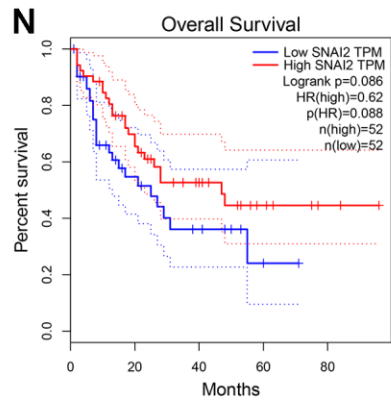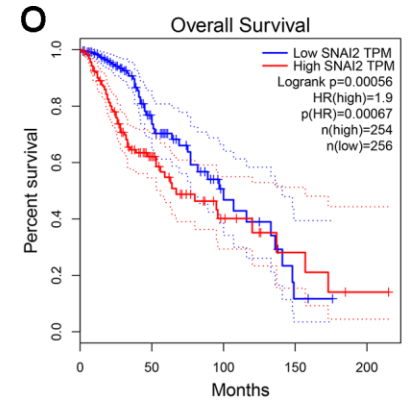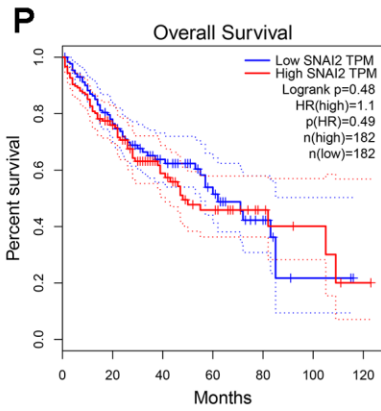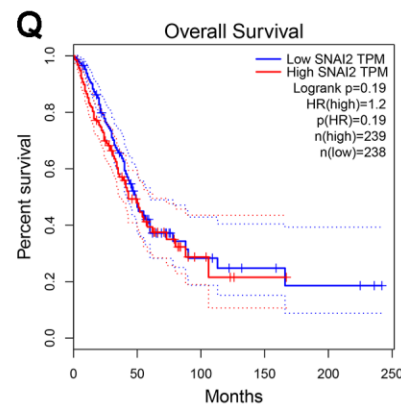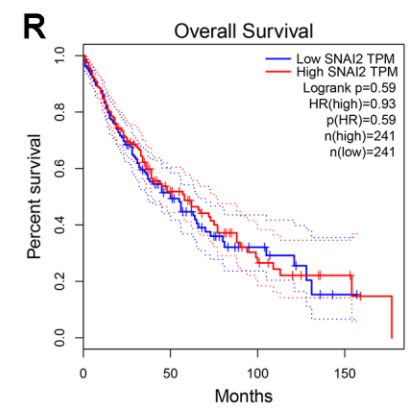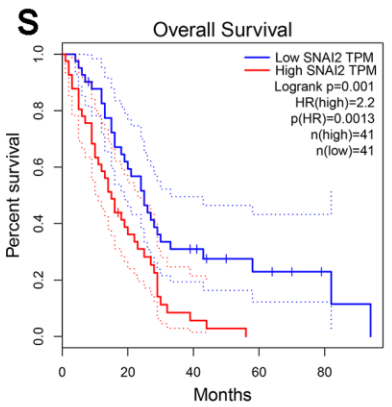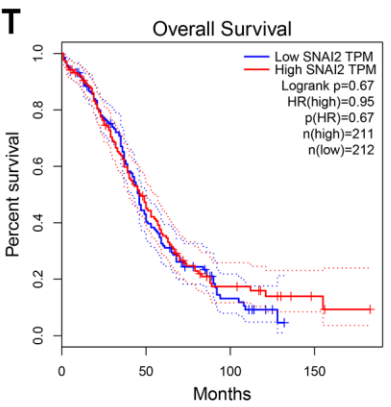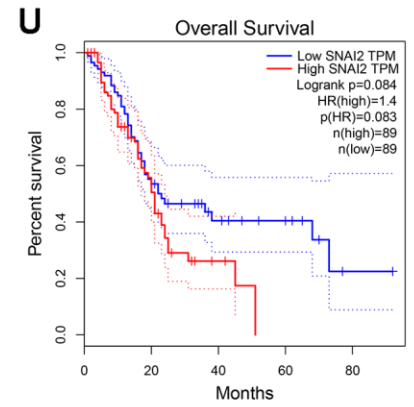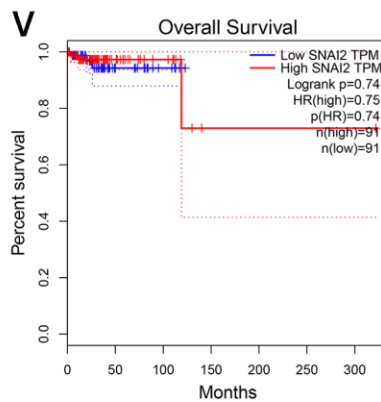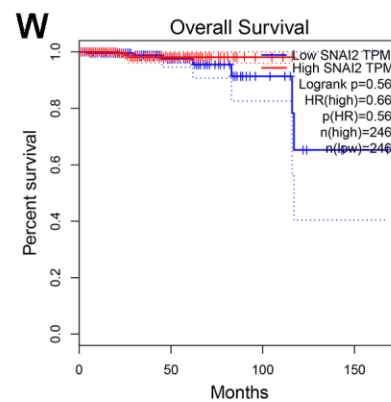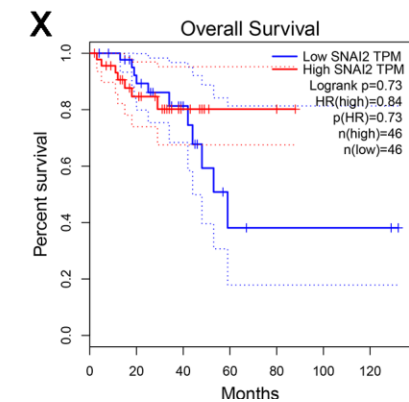

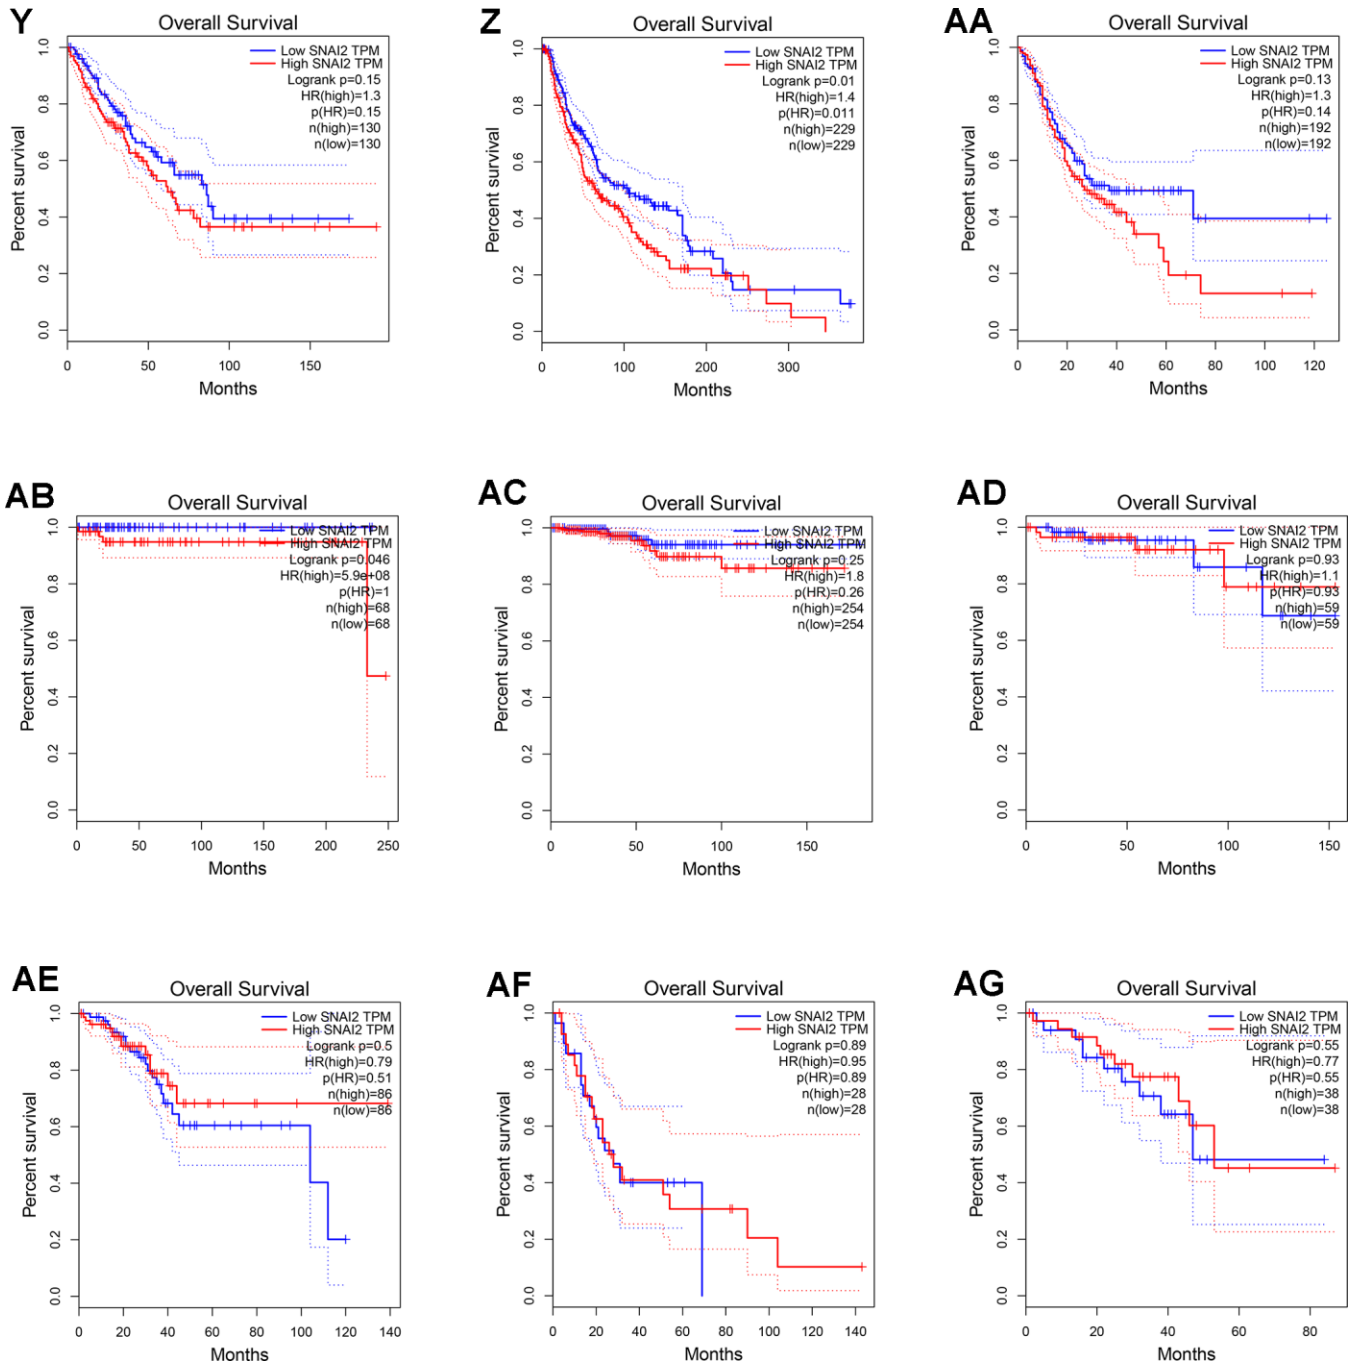

Supplementary Figure 5. Kaplan-Meier survival curves comparing the high and low expression of SNAI2 in different types of human cancers in TCGA dataset.

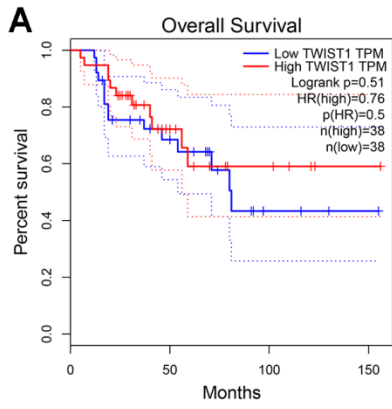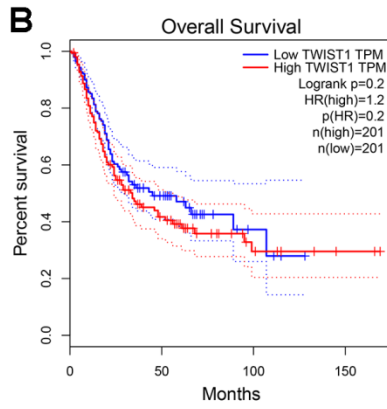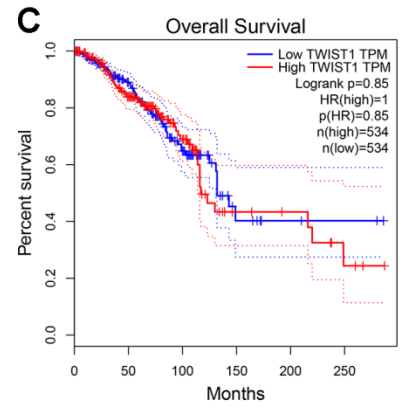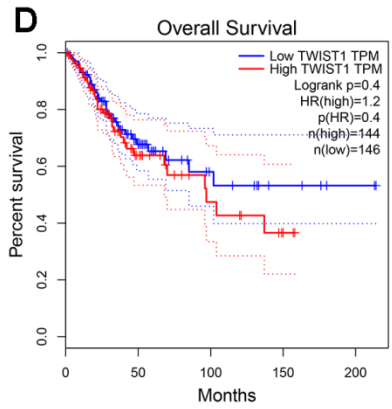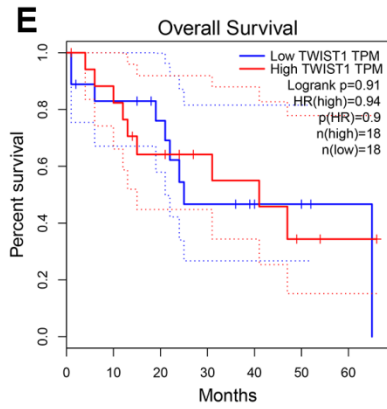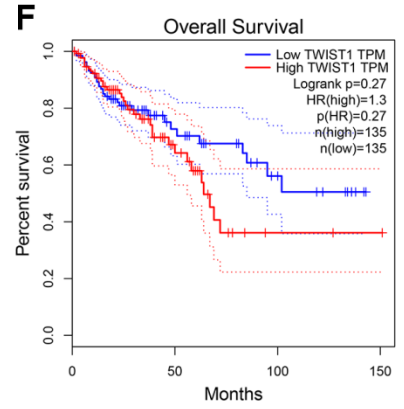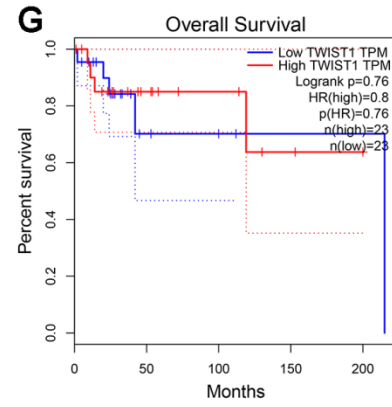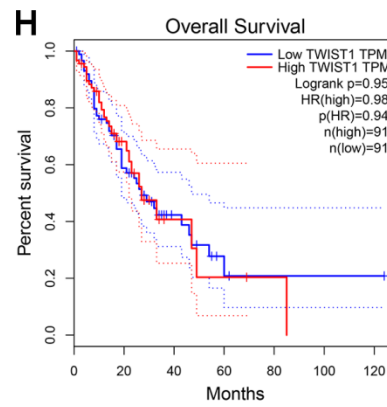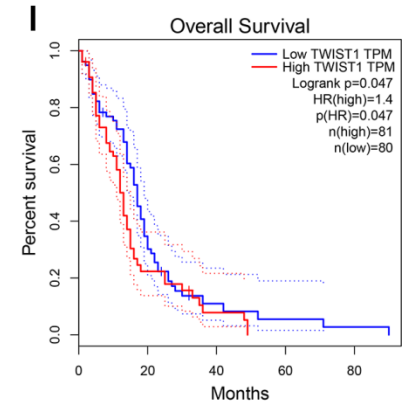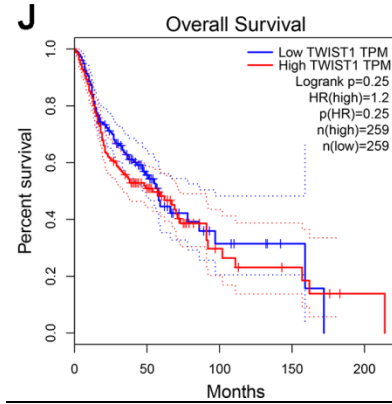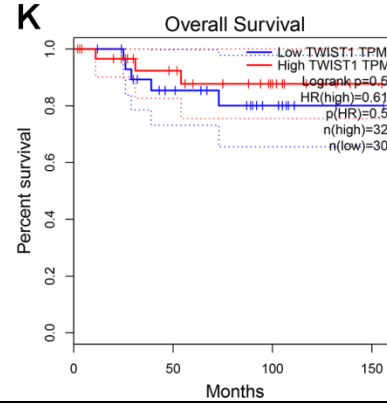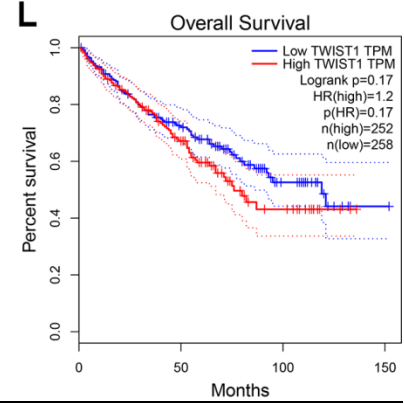

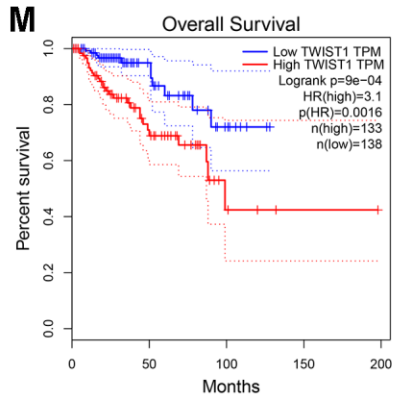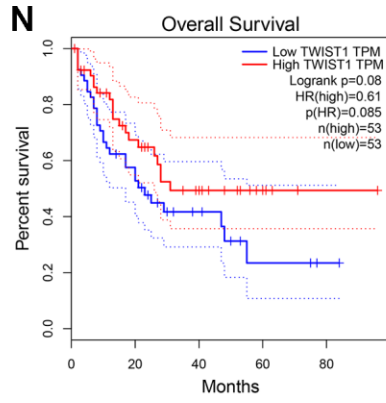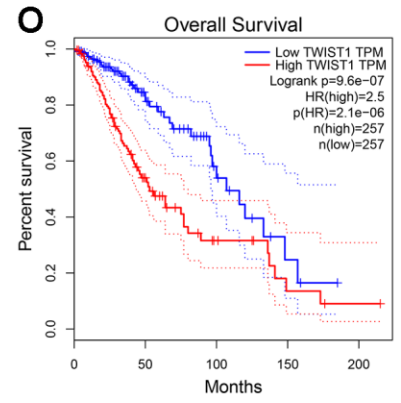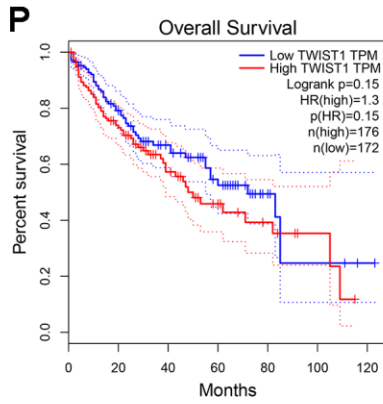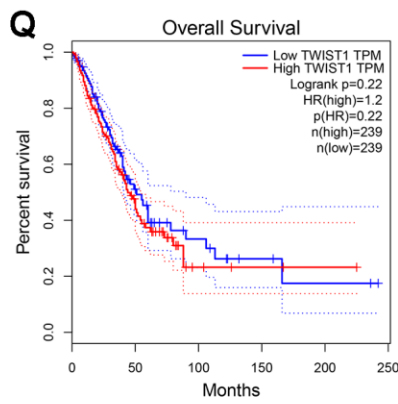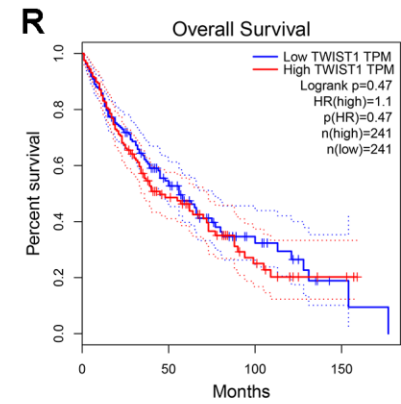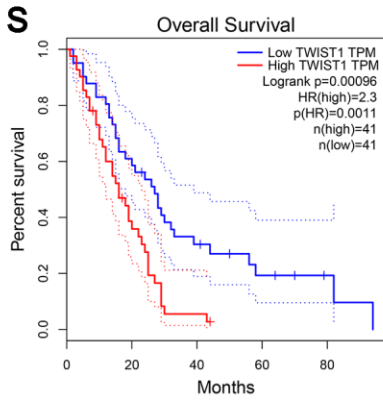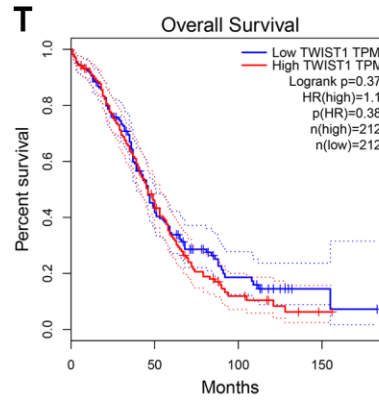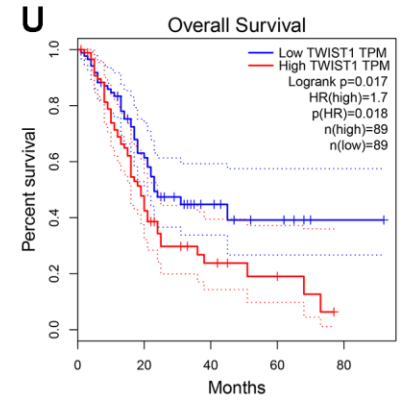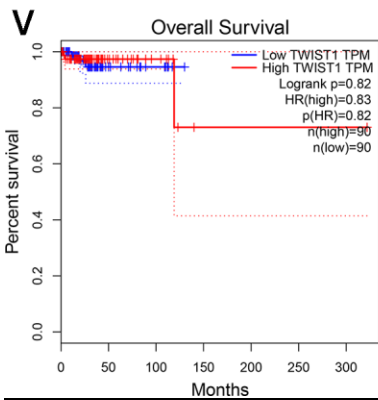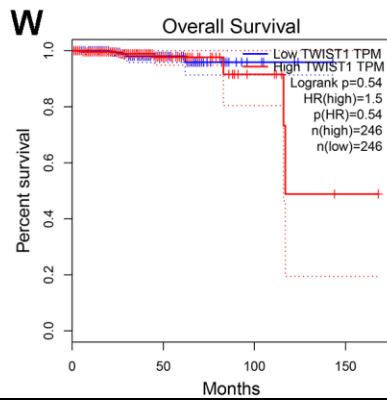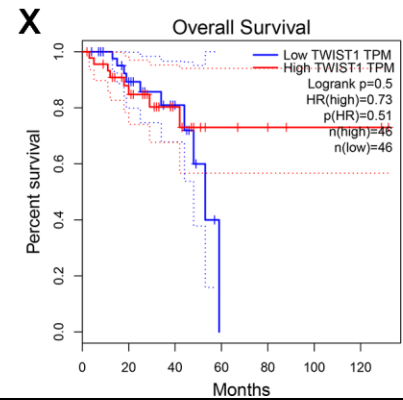



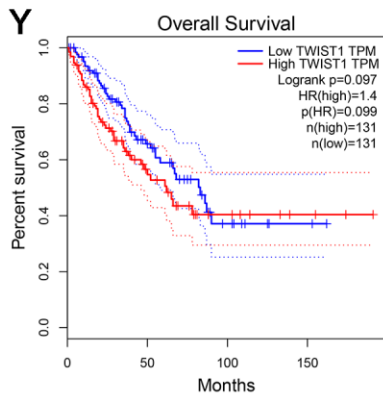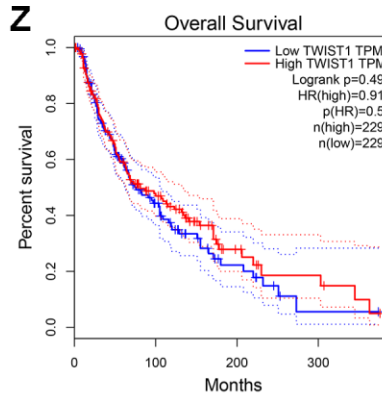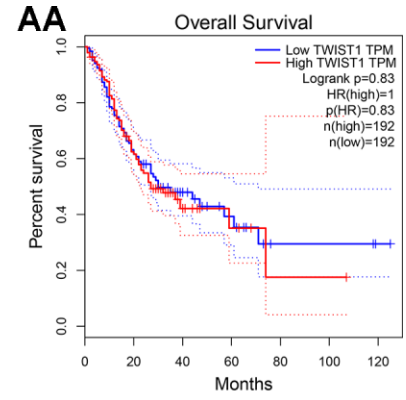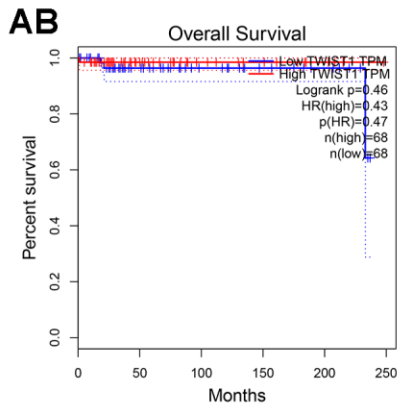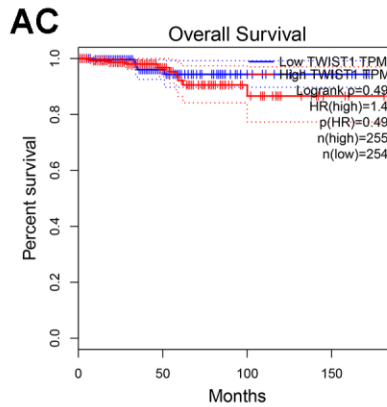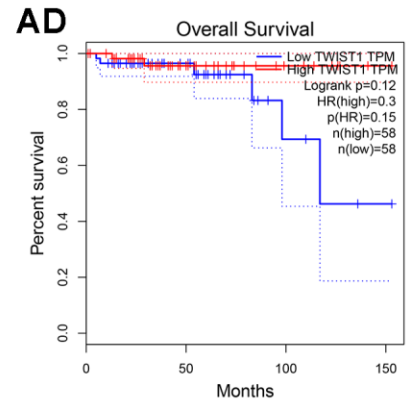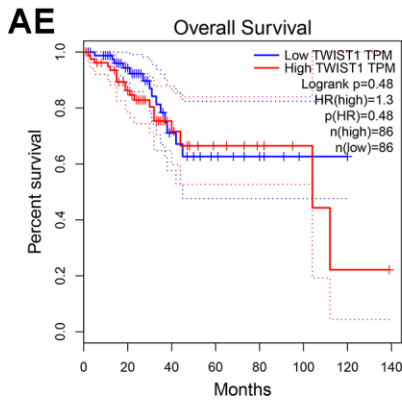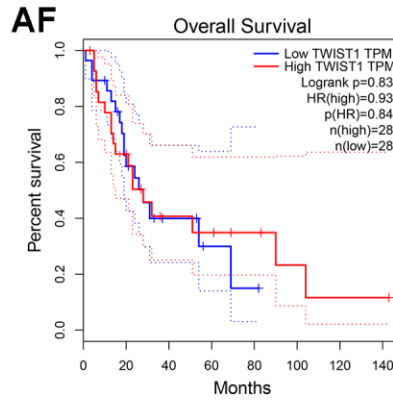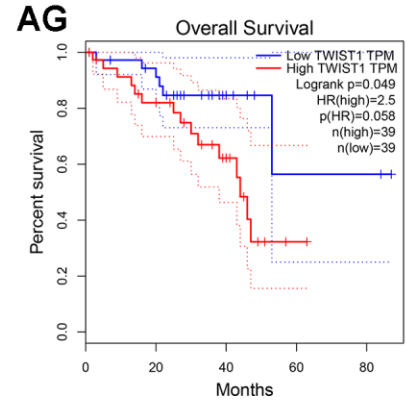

Supplementary Figure 6. Kaplan-Meier survival curves comparing the high and low expression of TWIST1 in different types of human cancers in TCGA dataset.

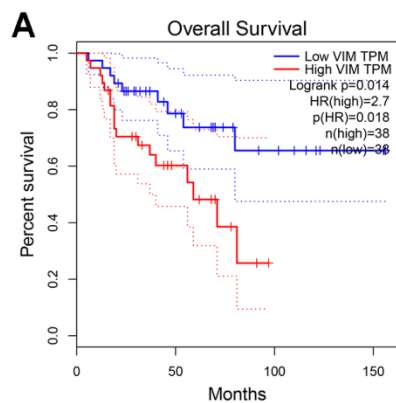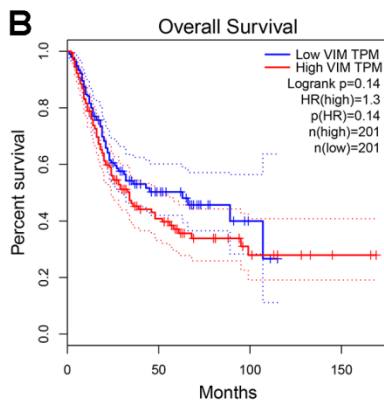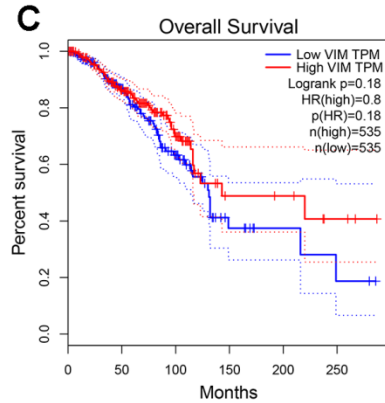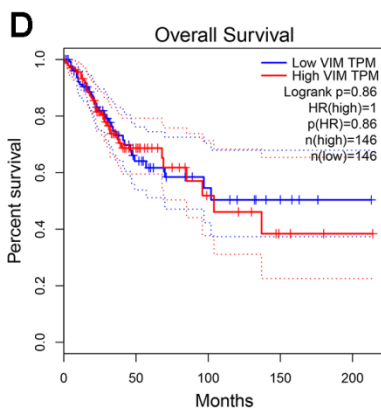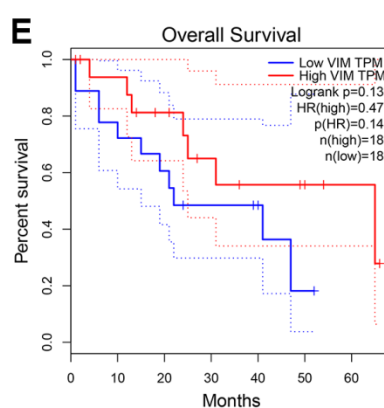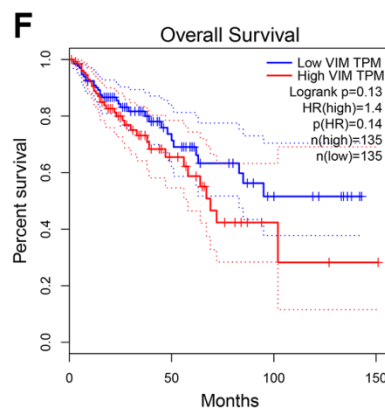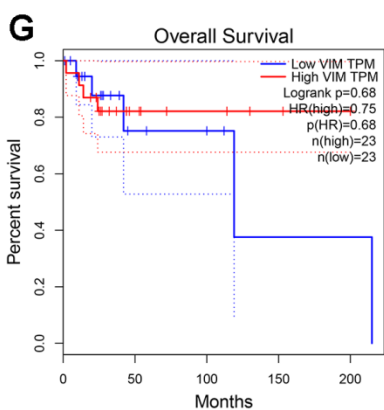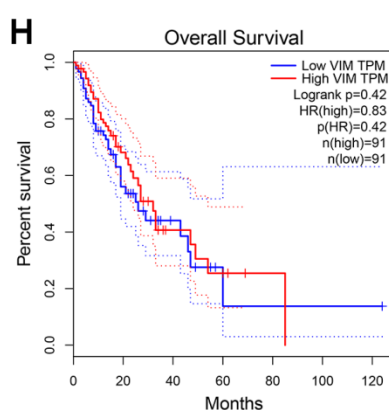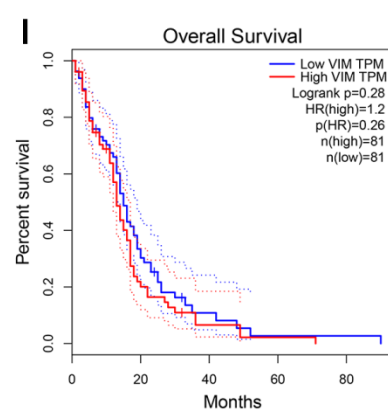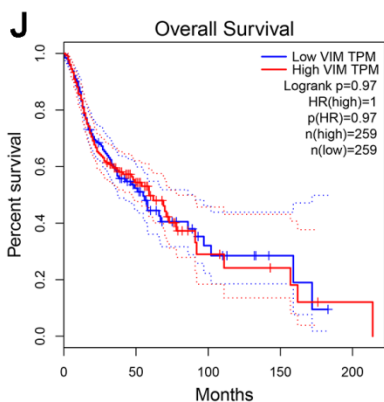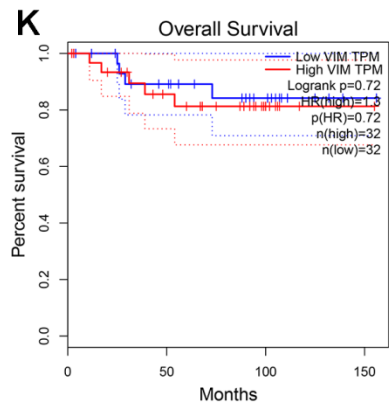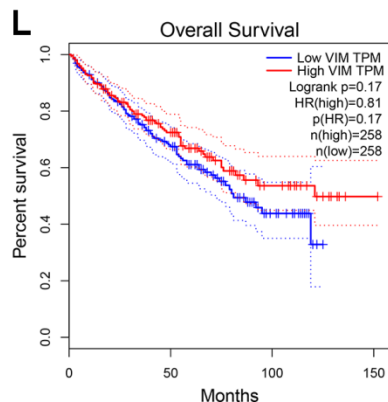

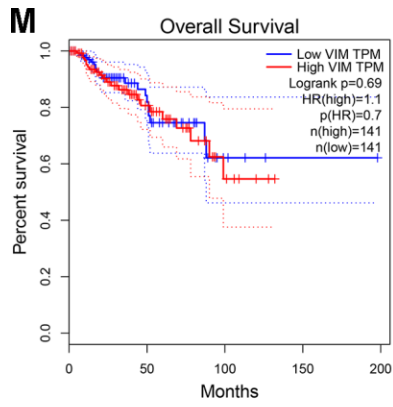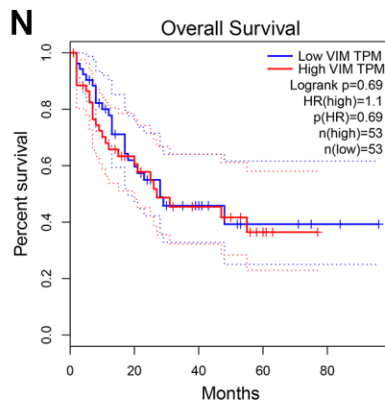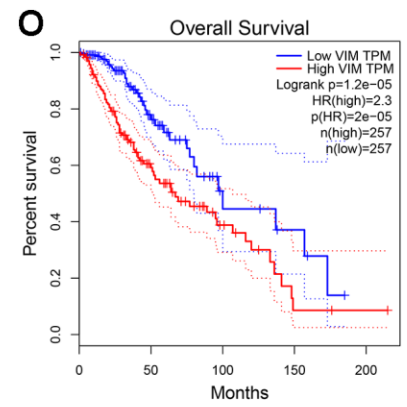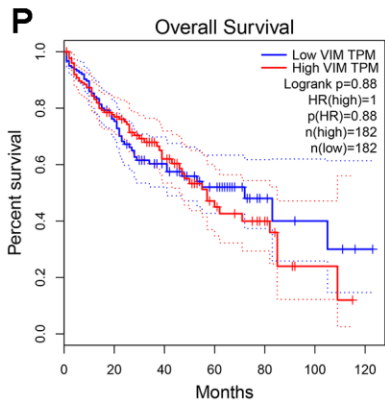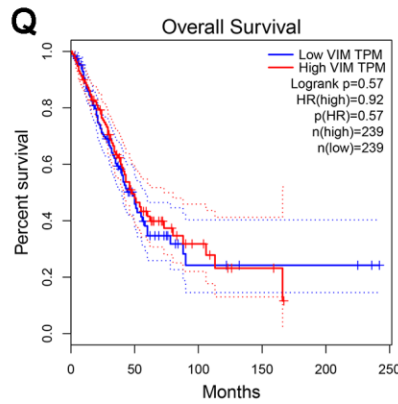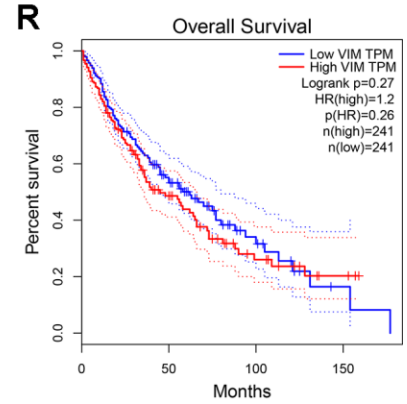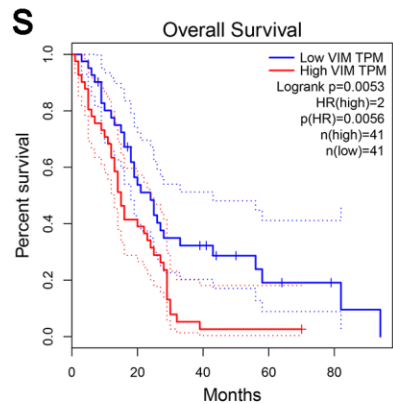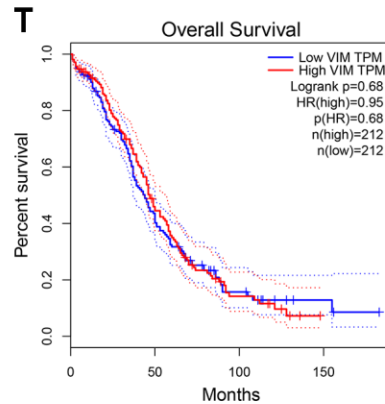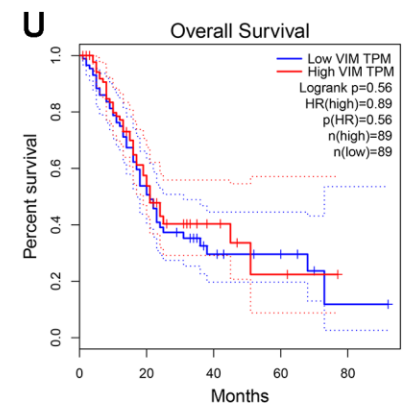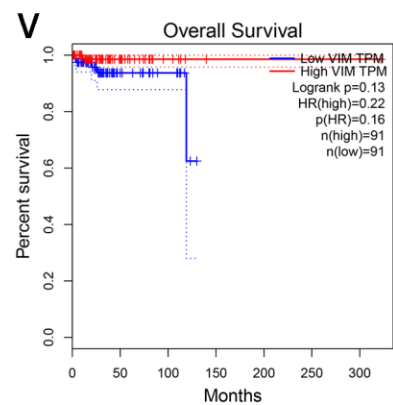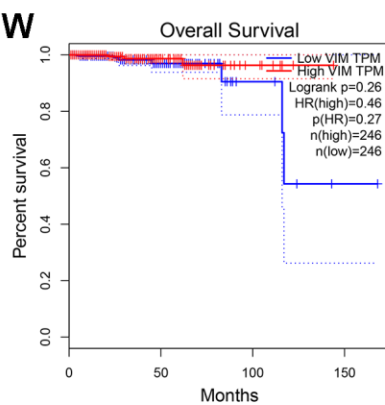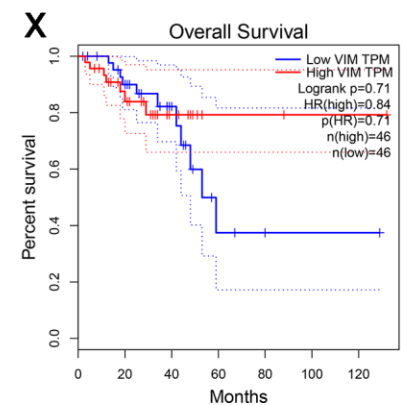

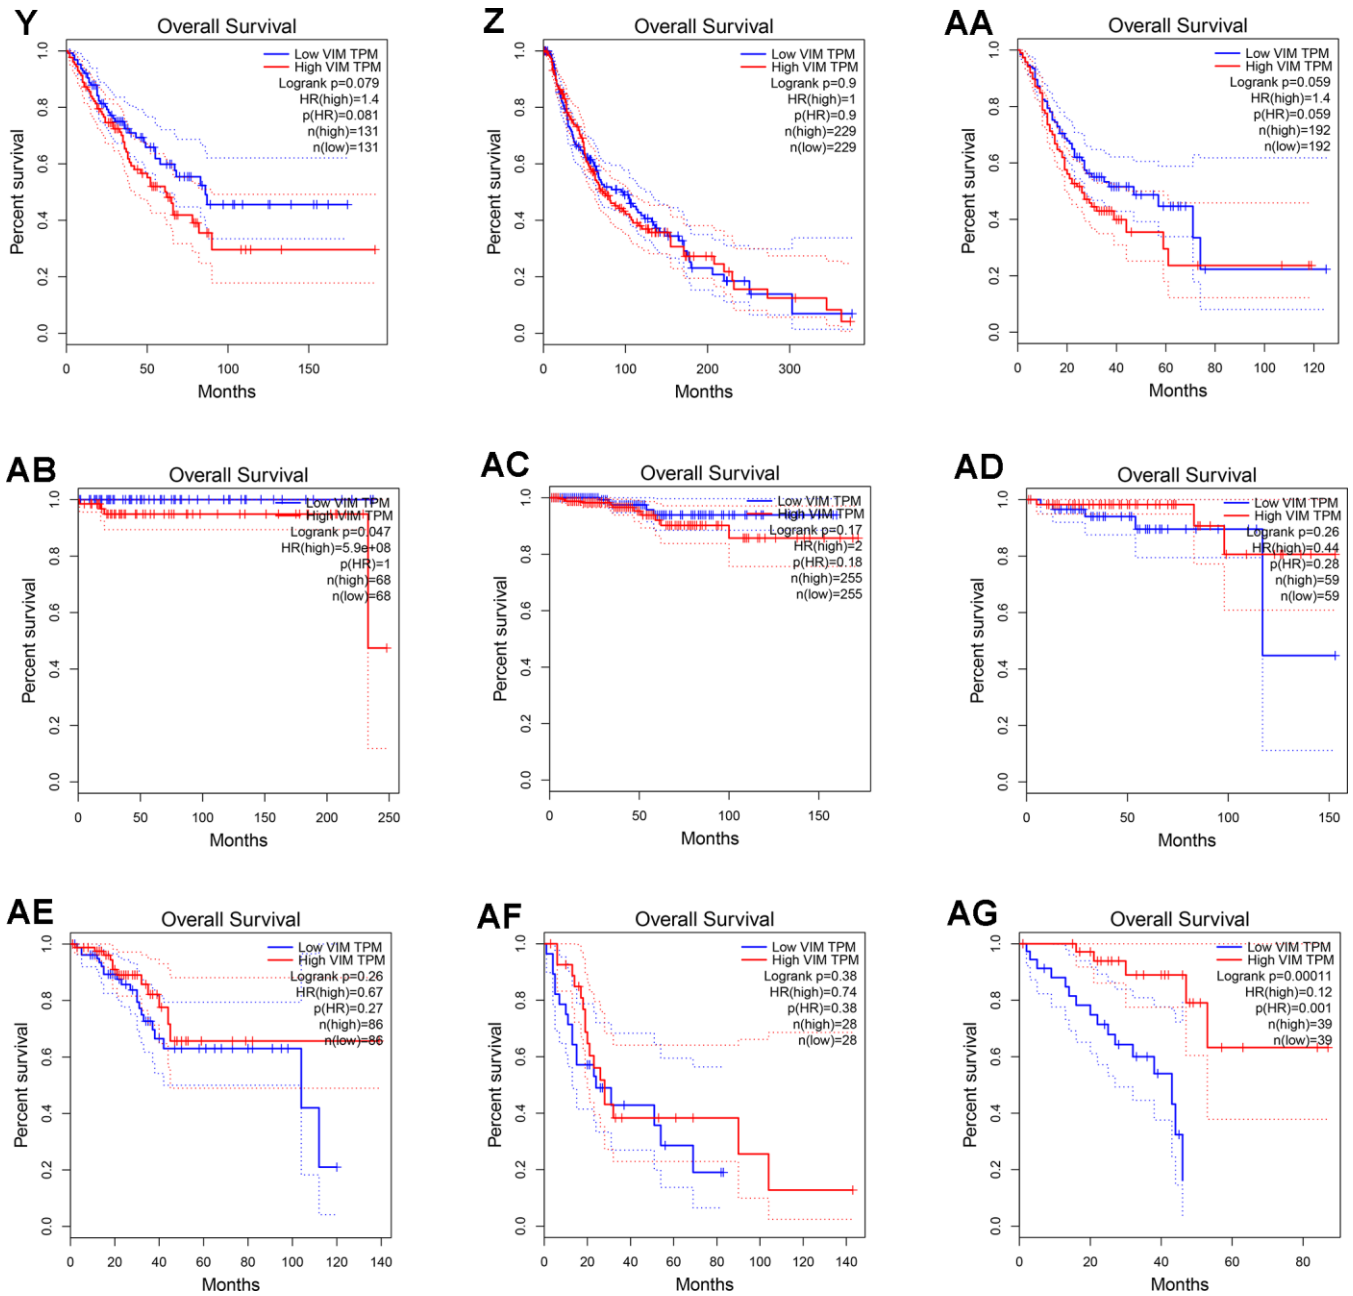

Supplementary Figure 7. Kaplan-Meier survival curves comparing the high and low expression of VIM in different types of human cancers in TCGA dataset.

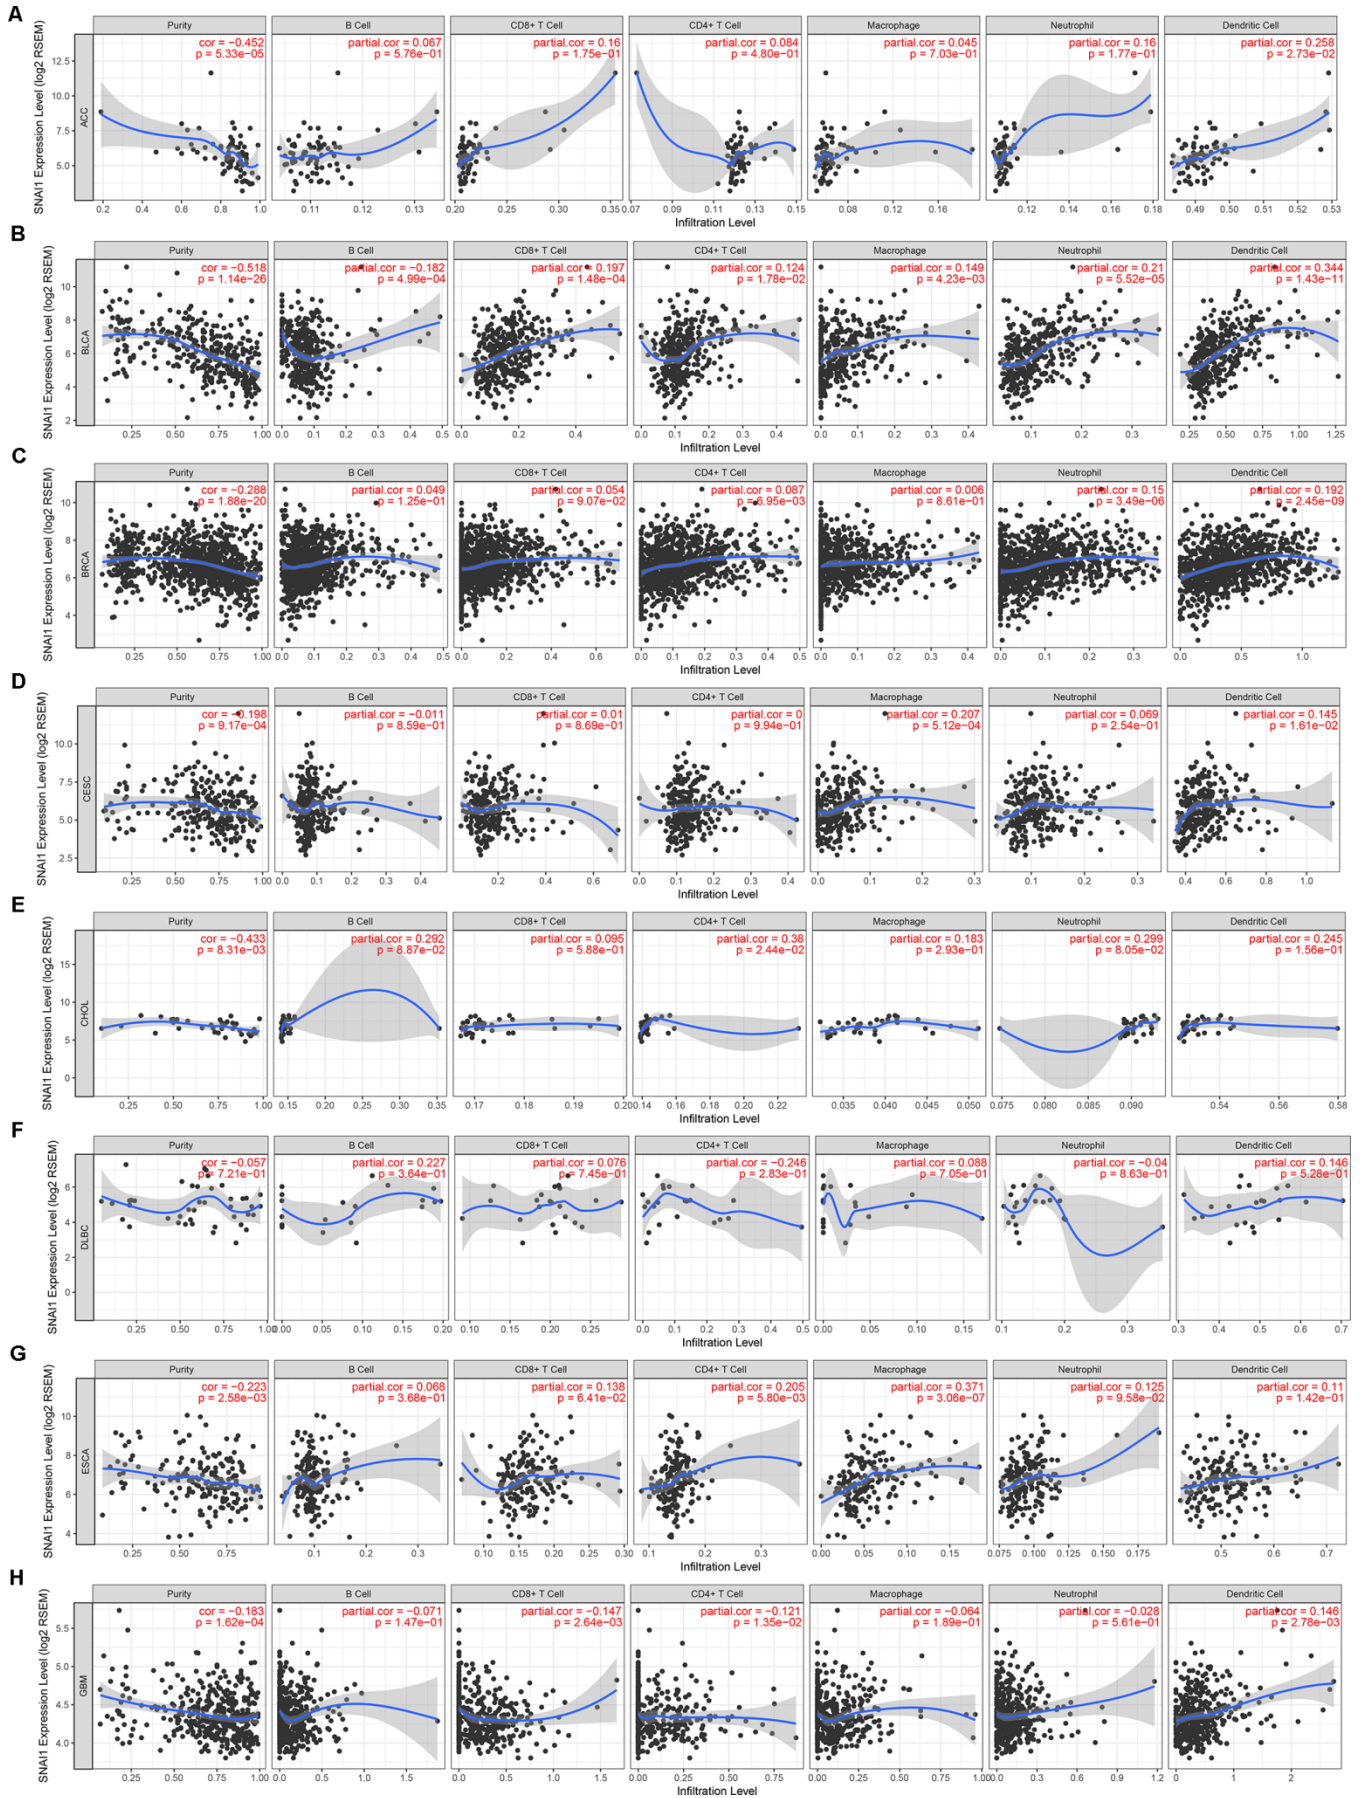

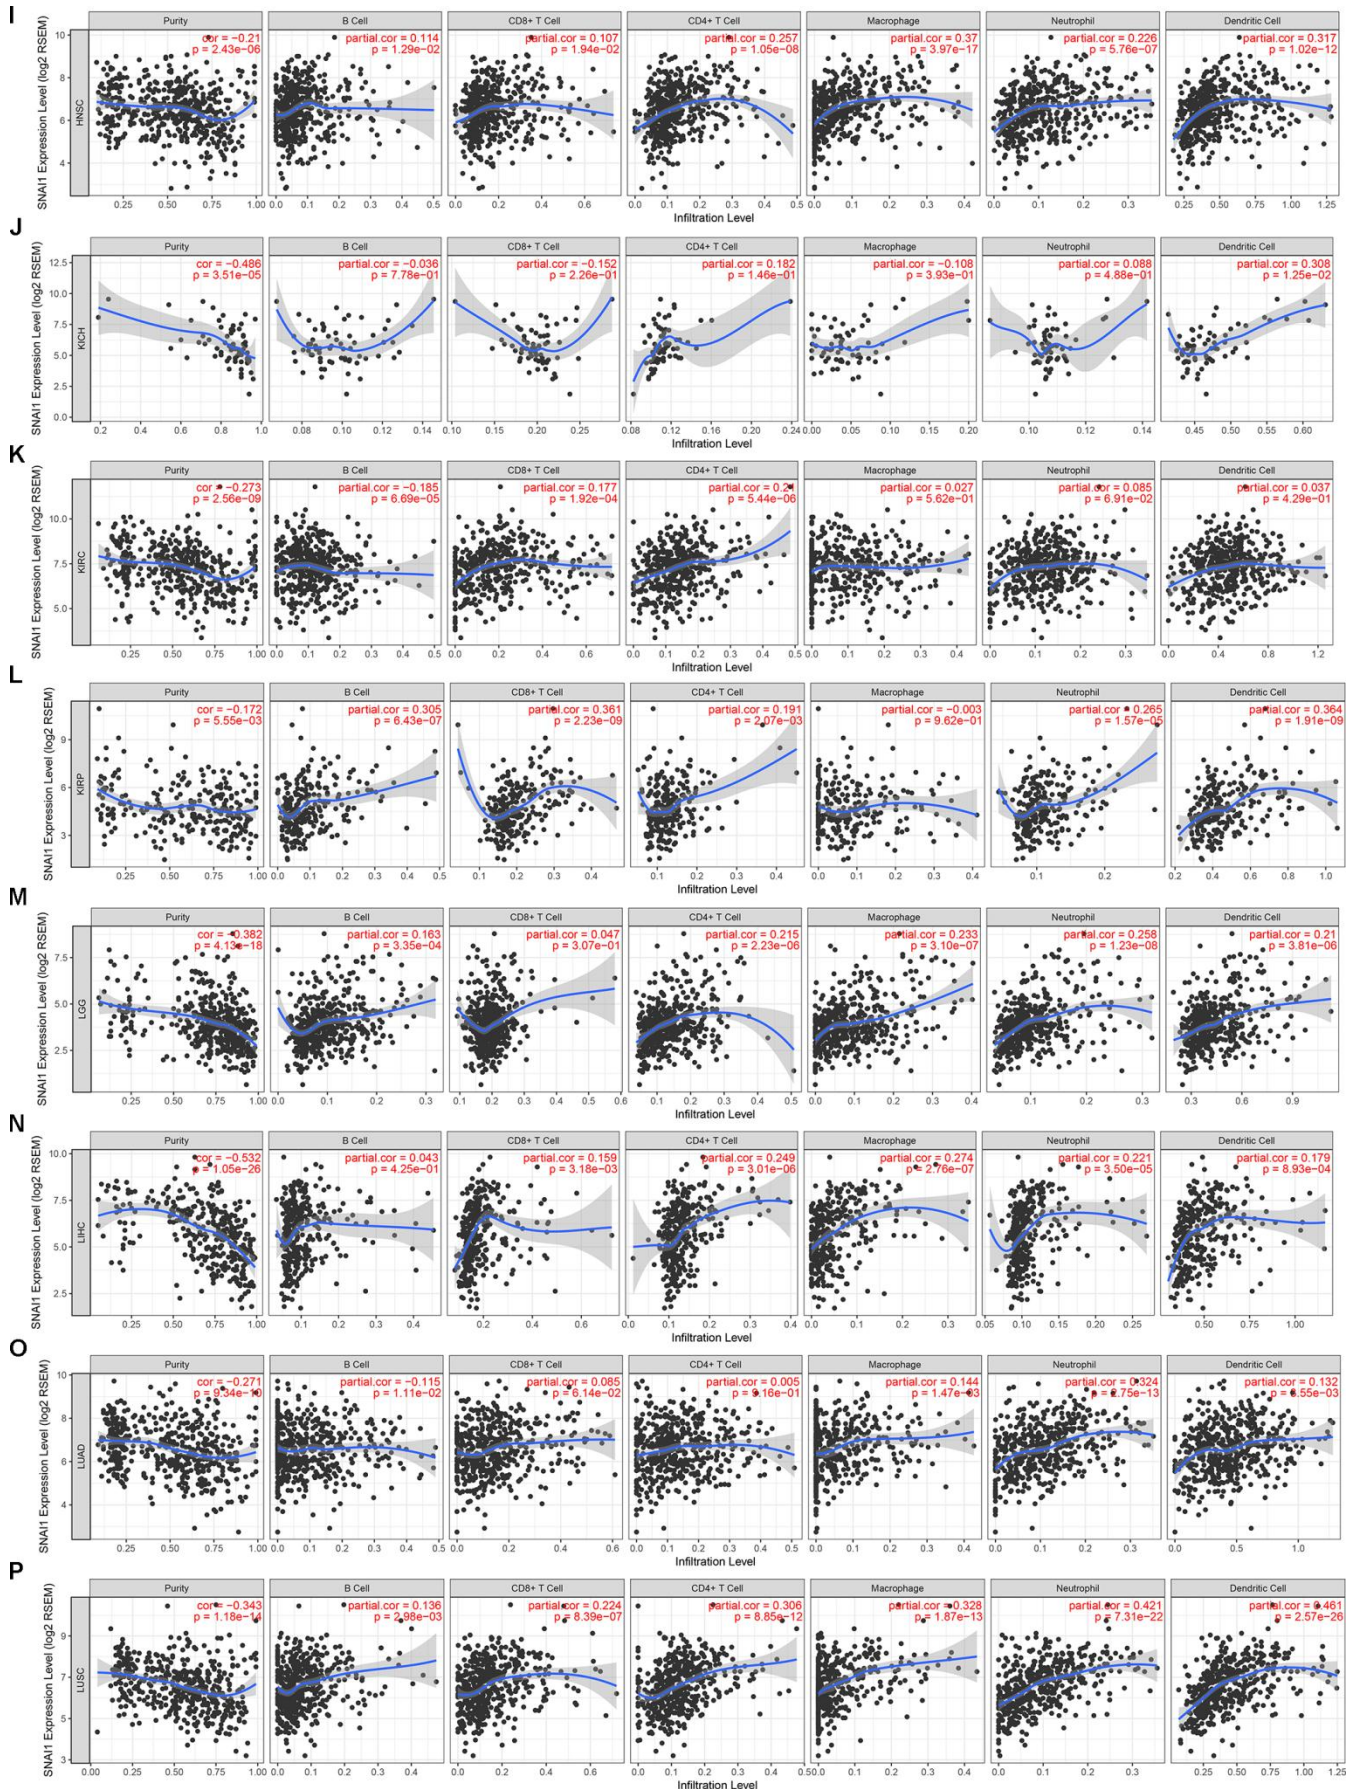

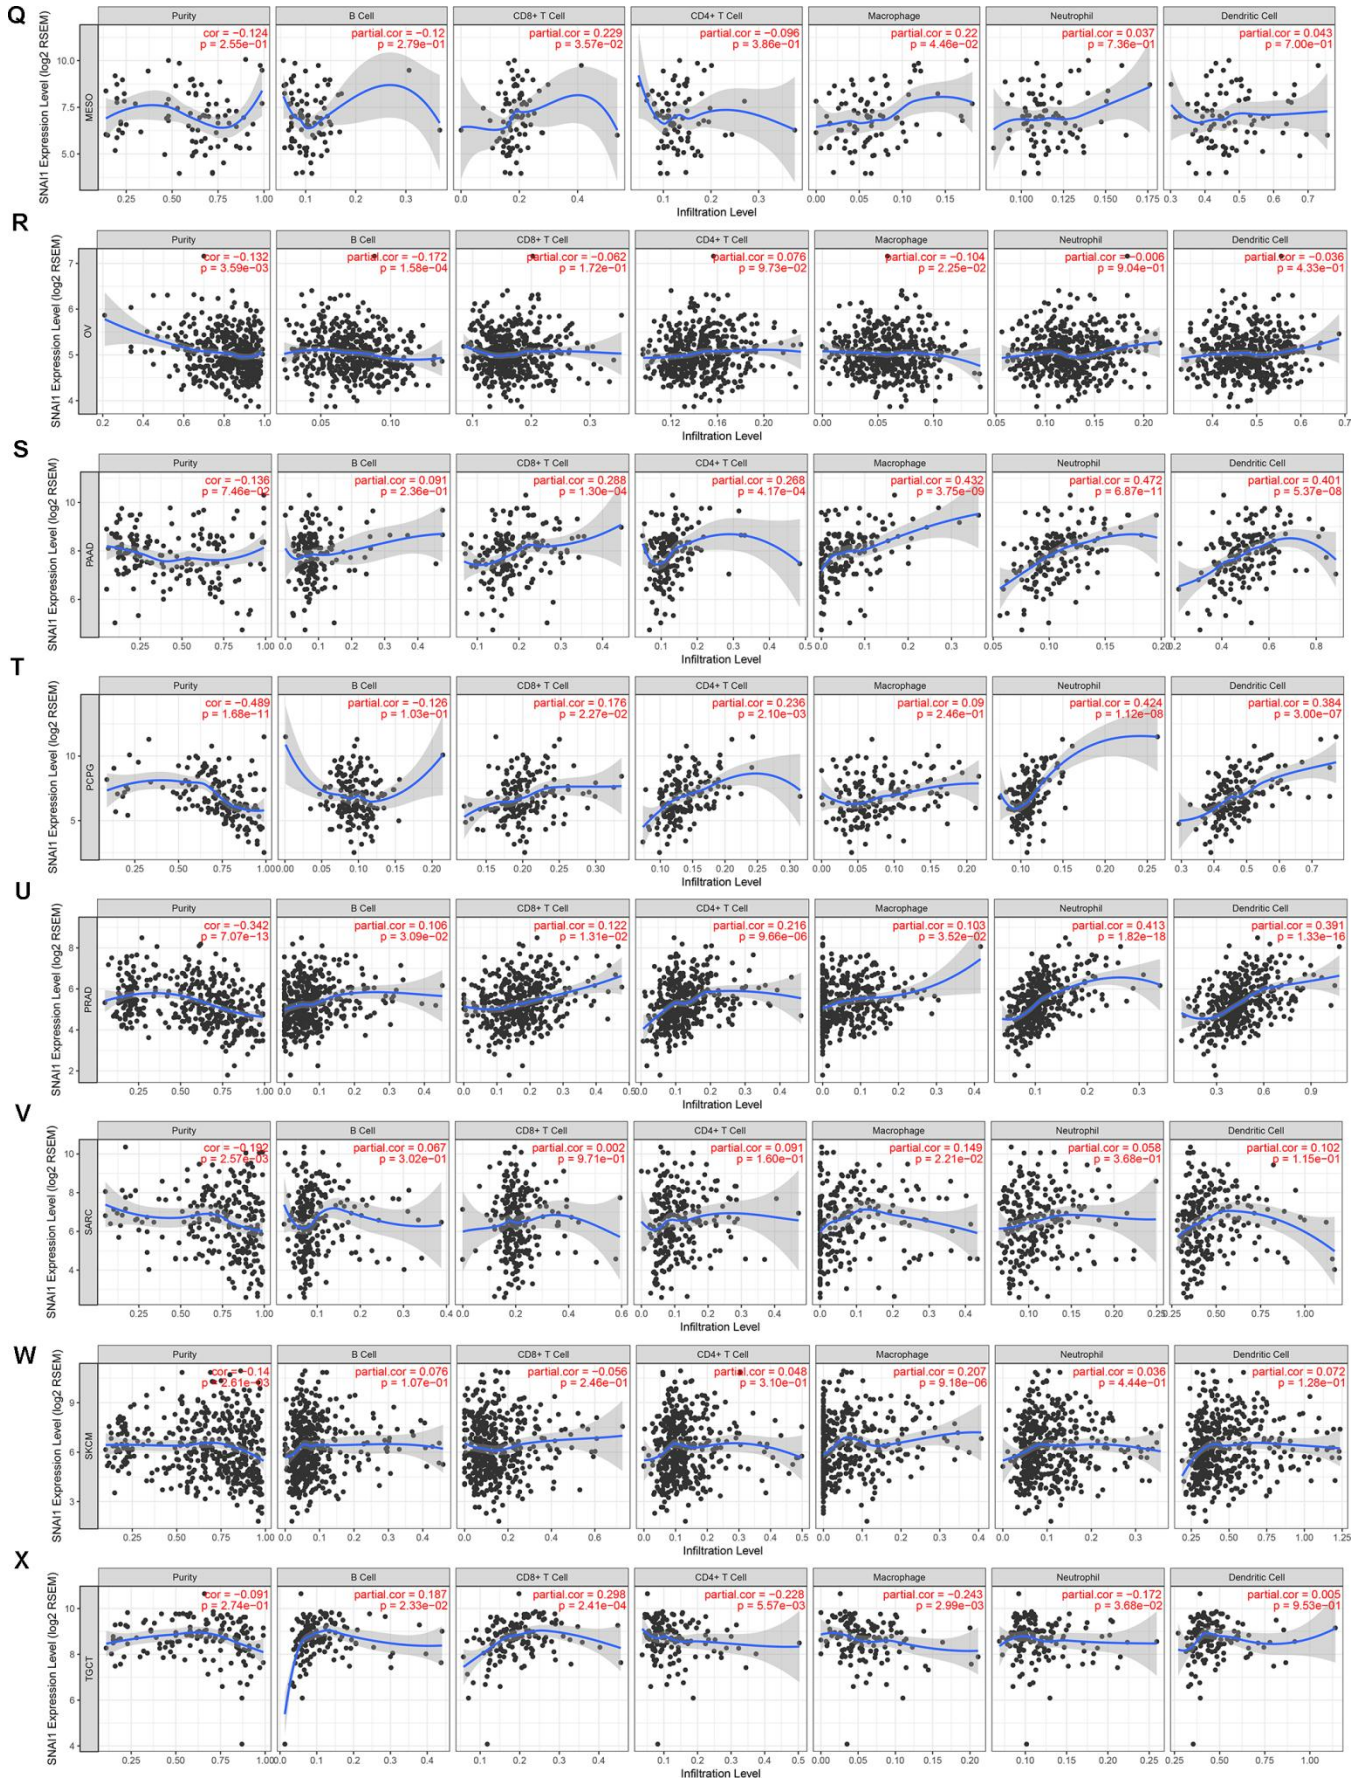

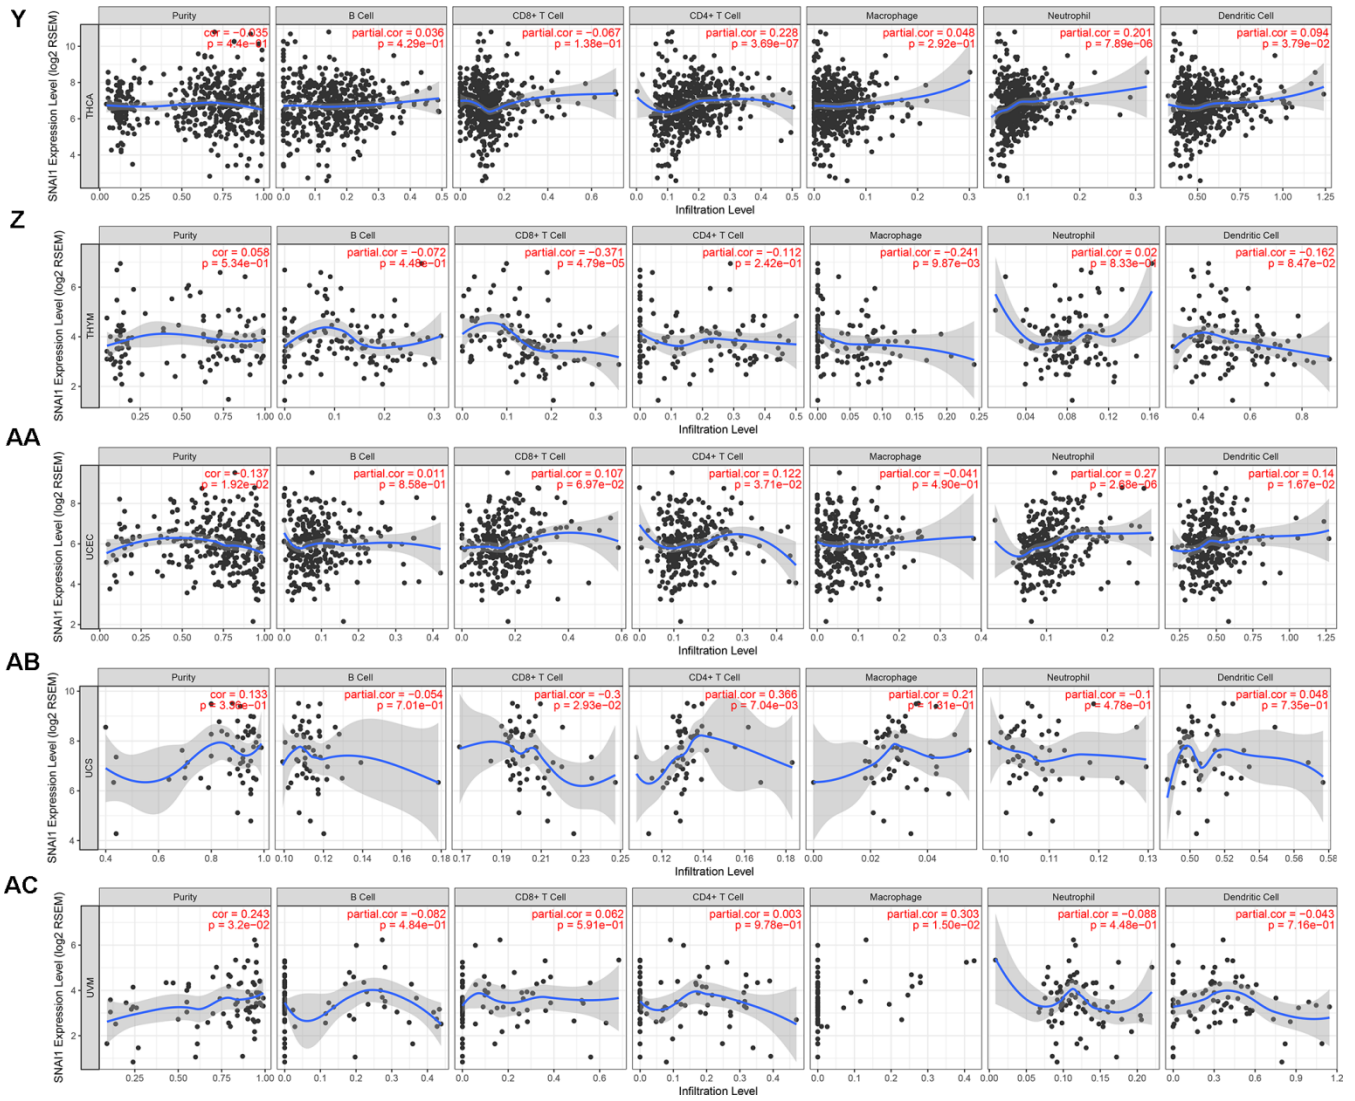

Supplementary Figure 8. Correlation of SNAI1 expression with tumor-infiltrating lymphocytes in different types of human cancers in TCGA dataset.



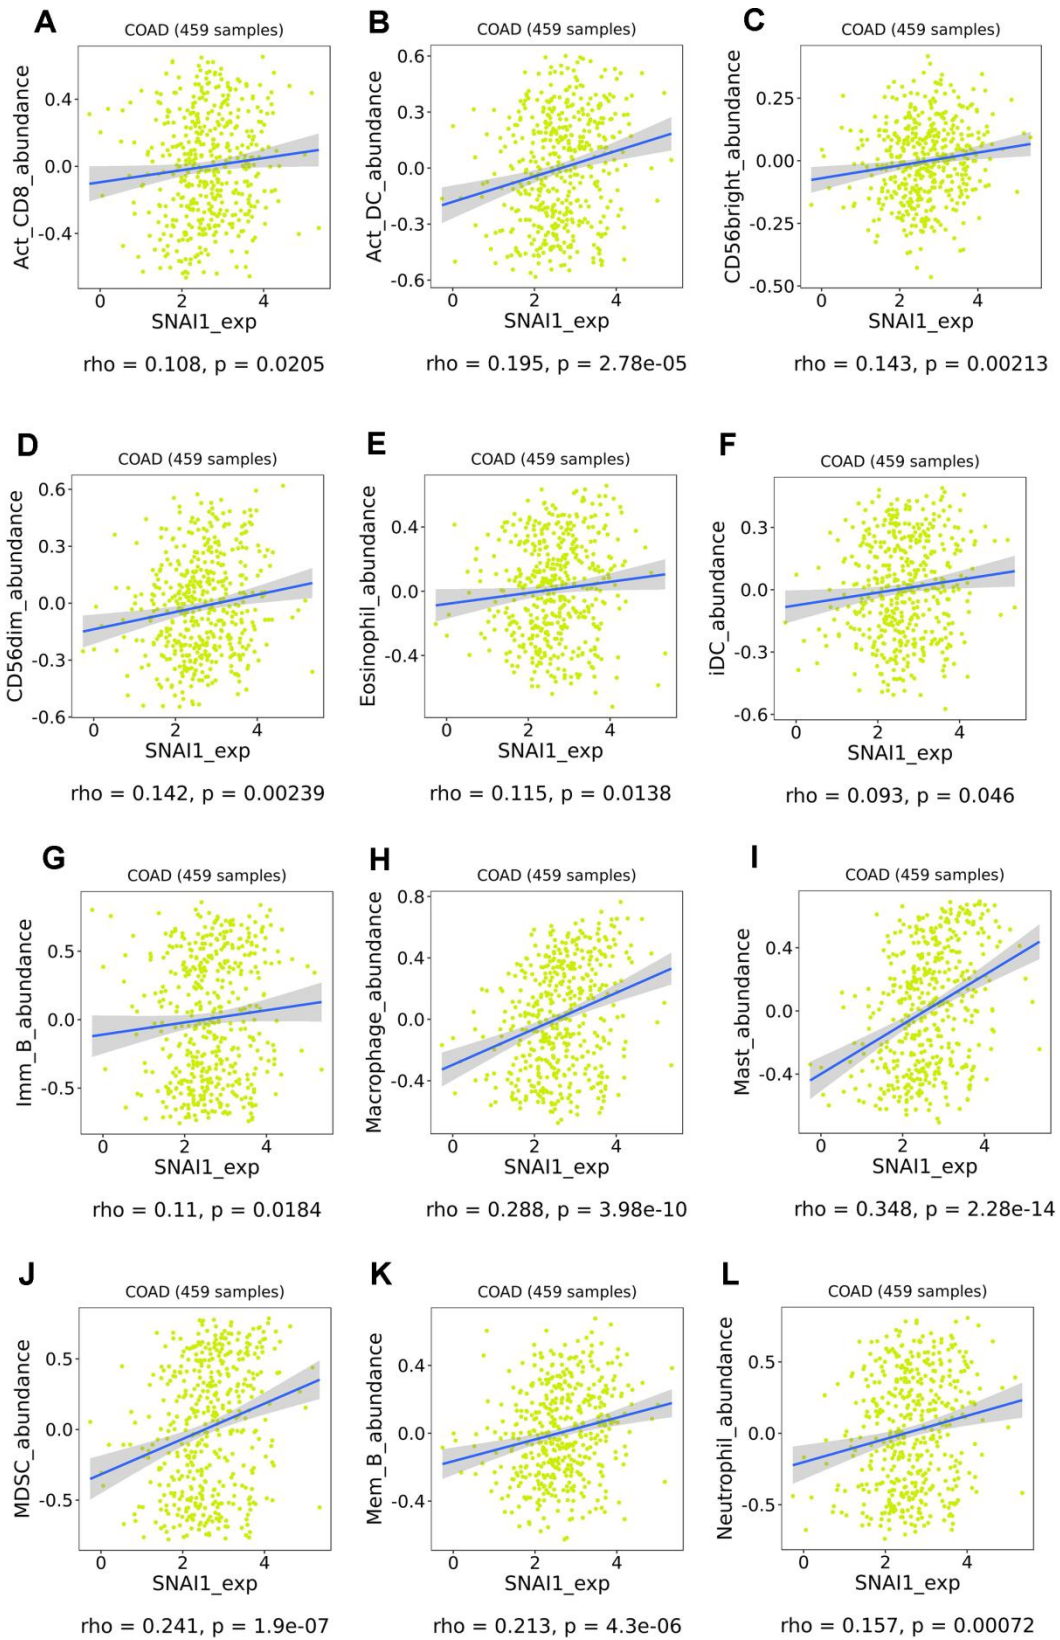

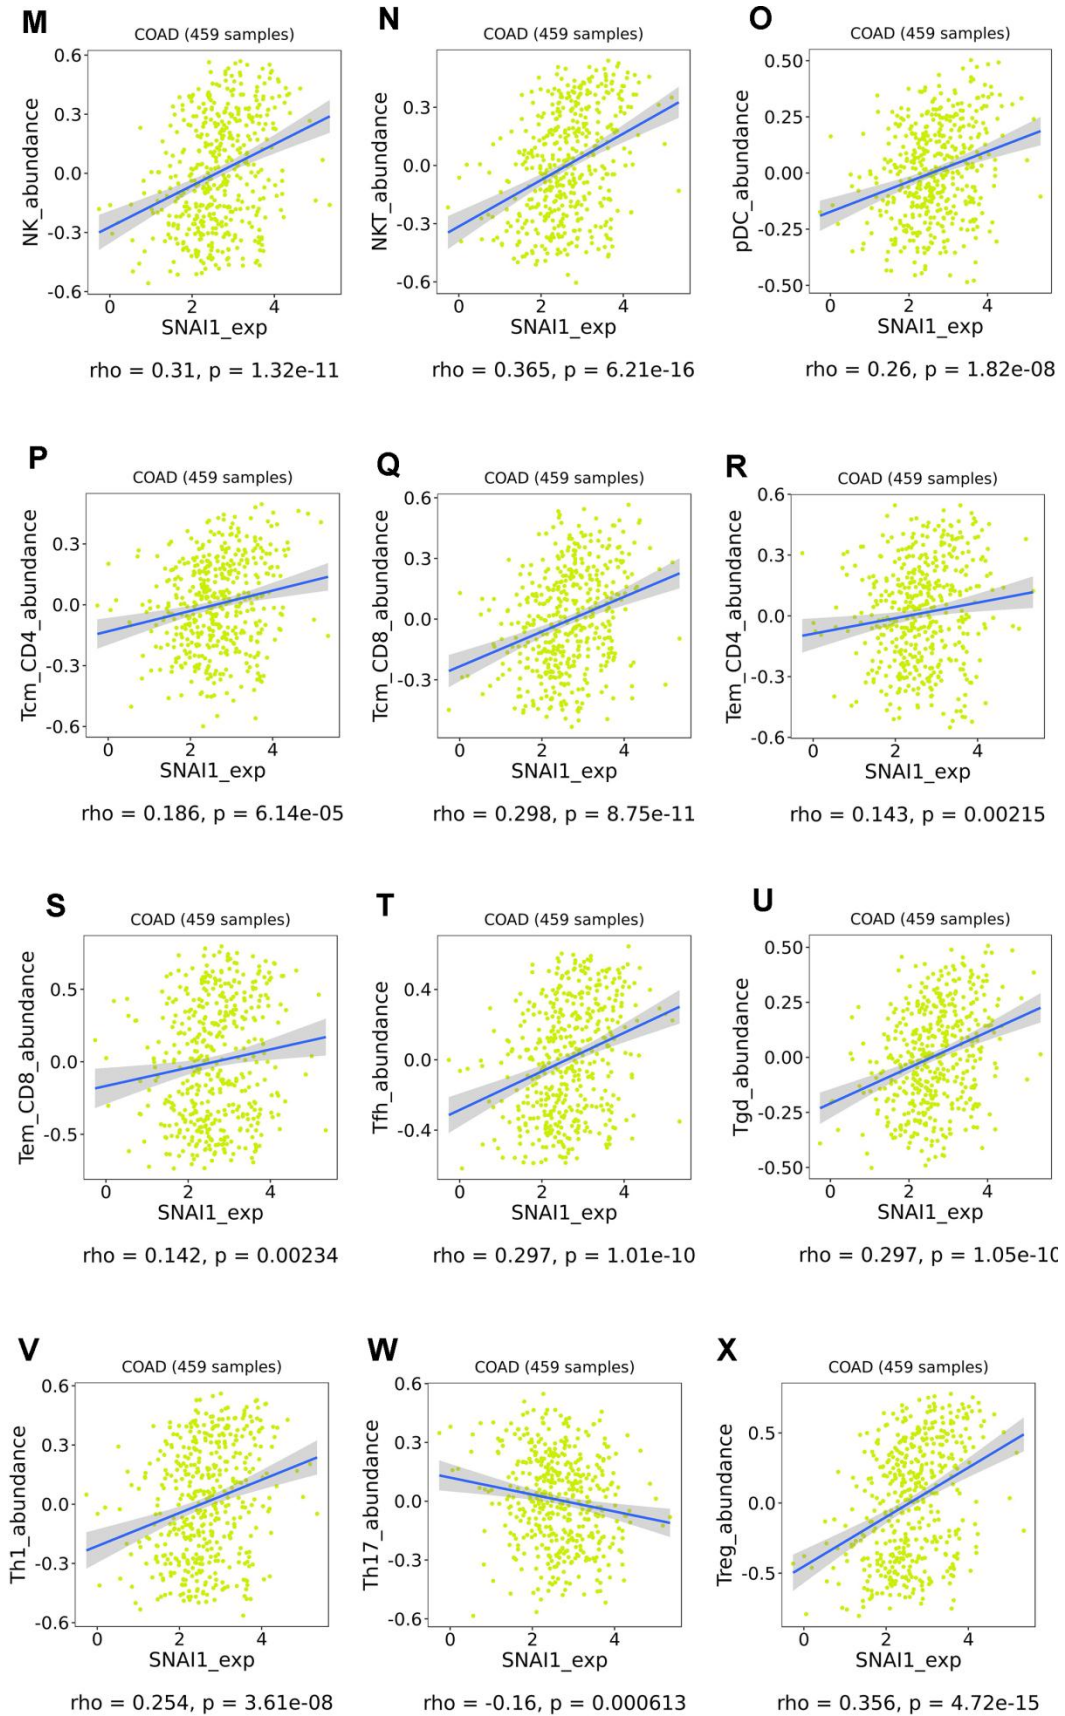

Supplementary Figure 9. Correlation of SNAI1 expression with 28 TILs in different types of human cancers in TCGA dataset.
